# Supplementary material for: Thermally activated rotational disorder in CaMoO4nanocrystals
Source: Royal Society of Chemistry journal article supplement (doi:10.1039/c6ce00673f), 2016-01-01
Supplement: c6ce00673f1.pdf [file c6ce00673f1.pdf]

## Thermally Activated Rotational Disorder in CaMoO<sub>4</sub> Nanocrystals

Sean P. Culver and Richard L. Brutchey\*

Department of Chemistry, University of Southern California, Los Angeles, CA 90089 (USA)

**Synthesis of CaMoO<sub>4</sub> Nanocrystals.** CaMoO<sub>4</sub> nanocrystals were synthesized via a vapor diffusion sol-gel method described in detail elsewhere.<sup>1,2</sup> Briefly, MoO<sub>2</sub>(acac)<sub>2</sub> (95%, Strem Chemicals, Inc.) was dissolved in a Ca(OCH<sub>2</sub>CH<sub>2</sub>OCH<sub>3</sub>)<sub>2</sub> alkoxide solution (19–25 wt. % in methoxypropanol, Gelest, Inc.) in a 1:1 molar ratio. The resulting solution was exposed to a controlled flow of water vapor for 48 h at room temperature and atmospheric pressure. Diffusion of water vapor into the solution resulted in the formation of a highly contracted gel, which was subsequently aged under nitrogen atmosphere for 24 h at 80 °C. The resulting gel was collected, washed with absolute ethanol (3 × 10 mL), and vacuum dried at room temperature to recover an off-white fine powder consisting of CaMoO<sub>4</sub> nanocrystals. These exhibited quasispherical shape with an average diameter of 9.3 ± 2.7 nm, as determined by transmission electron microscopy analysis (N = 250).

**Synchrotron X-ray Diffraction.** X-ray diffraction patterns were collected at the 11-ID-B beamline of the Advanced Photon Source at Argonne National Laboratory. An incident photon energy of 90.484 keV ( $\lambda = 0.137024 \text{ \AA}$ ) was employed. The sample was loaded in a Kapton tube and diffraction data were collected in transmission mode from 90–480 K at a rate of 6 K/min using the Oxford cryosystems cryostream 700 plus.

**Rietveld Analysis.** Rietveld structural refinements were carried out using the GSAS software.<sup>3,4</sup> Experimental data and atomic X-ray scattering factors were corrected for sample absorption and anomalous scattering, respectively. The average crystal structure of AMoO<sub>4</sub> nanocrystals was refined with the tetragonal  $I4_1/a$  (no. 88) space group. The following parameters were refined: (1) scale factor, (2) background, which was modeled using a shifted Chebyshev polynomial function, (3) peak shape, which was modeled using a modified Thomson–Cox–Hastings pseudo-Voigt function,<sup>5</sup> (4) lattice constants ( $a$  and  $c$ ), (5) fractional atomic coordinates of the oxygen atom ( $x_O$ ,  $y_O$ ,  $z_O$ ), and (6) atomic anisotropic displacement parameters constrained by the site symmetry ( $U^{11}$  and  $U^{33}$  for Ca and Mo, and  $U^{11}$ ,  $U^{22}$ ,  $U^{33}$ ,  $U^{12}$ ,  $U^{13}$ , and  $U^{23}$  for O). The  $R_{wp}$  indicator was employed to assess the quality of the refined structural models.<sup>6</sup>

**Pair Distribution Function Analysis.** The pair distribution function  $G(r)$  defined as:

$$G(r) = 4\pi r [\rho(r) - \rho_0] = (2 / \pi) \int_0^{Q_{max}} Q [S(Q) - 1] \sin(Qr) dQ$$

was employed for structural analysis. Here,  $r$  is the radial distance,  $\rho(r)$  and  $\rho_0$  are the local and average atomic number density, respectively, and  $Q$  is the magnitude of scattering vector. The RAD software was employed to extract  $G(r)$  from the raw diffraction data.<sup>7</sup> These were first corrected for background, sample absorption, and Compton scattering. Then, normalized structure functions  $S(Q)$  were obtained. Finally,  $S(Q)$  was Fourier-transformed to yield  $G(r)$ . A maximum scattering vector ( $Q_{max}$ ) of  $24.5 \text{ \AA}^{-1}$  was employed in the Fourier transform. Structural refinements were carried out using the PDFgui software.<sup>8</sup> The local crystal structure of CaMoO<sub>4</sub> nanocrystals was refined with the tetragonal  $I4_1/a$  space group. Fits of this structural model to the experimental PDFs were performed in the 1.5–13 Å interatomic distance range in order to account for all atom–atom pairs along the largest dimension of the unit cell. The following parameters were refined: (1) scale factor, (2) lattice constants ( $a$  and  $c$ ), (3) fractional atomic

coordinates of the oxygen atom ( $x_o, y_o, z_o$ ), and (4) atomic anisotropic displacement parameters constrained by the site symmetry ( $U^{11}$  and  $U^{33}$  for Ca and Mo, and  $U^{11}$ ,  $U^{22}$ ,  $U^{33}$ ,  $U^{12}$ ,  $U^{13}$ , and  $U^{23}$  for O). The  $R_w$  indicator was employed to assess the quality of the refined structural models.<sup>9</sup>

## Figures and Tables

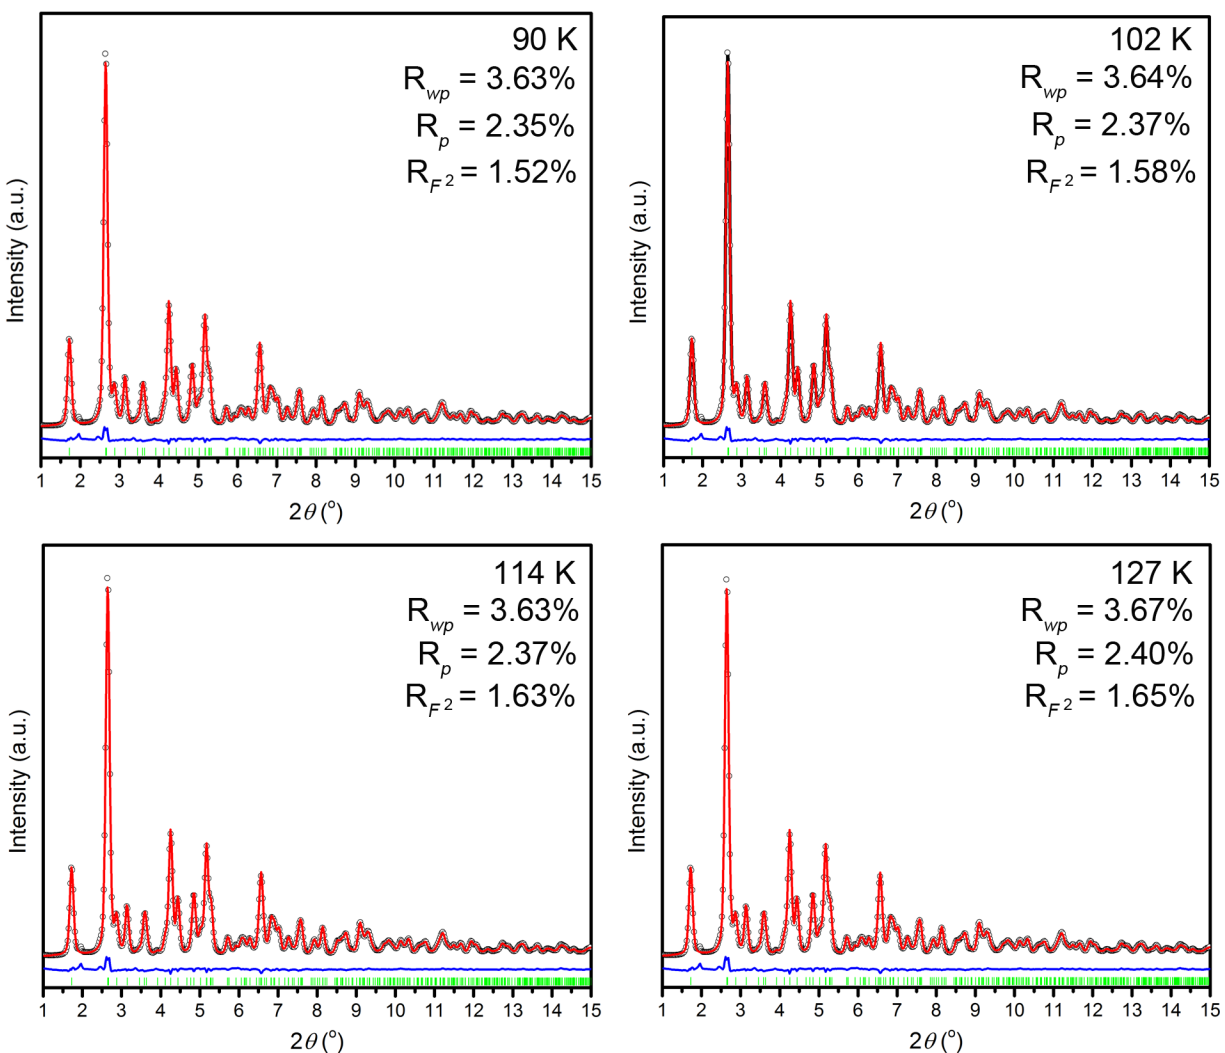

**Fig. S1** Rietveld analysis of X-ray total scattering data for CaMoO<sub>4</sub> nanocrystals from 90–480 K. Experimental (○) and calculated (—) patterns are shown, along with the difference curve (—) and tickmarks (|) corresponding to the phase refined. The temperature at which the pattern was collected is indicated in the top right of each pattern, along with the associated R<sub>wp</sub>.

—Continues on the following page.

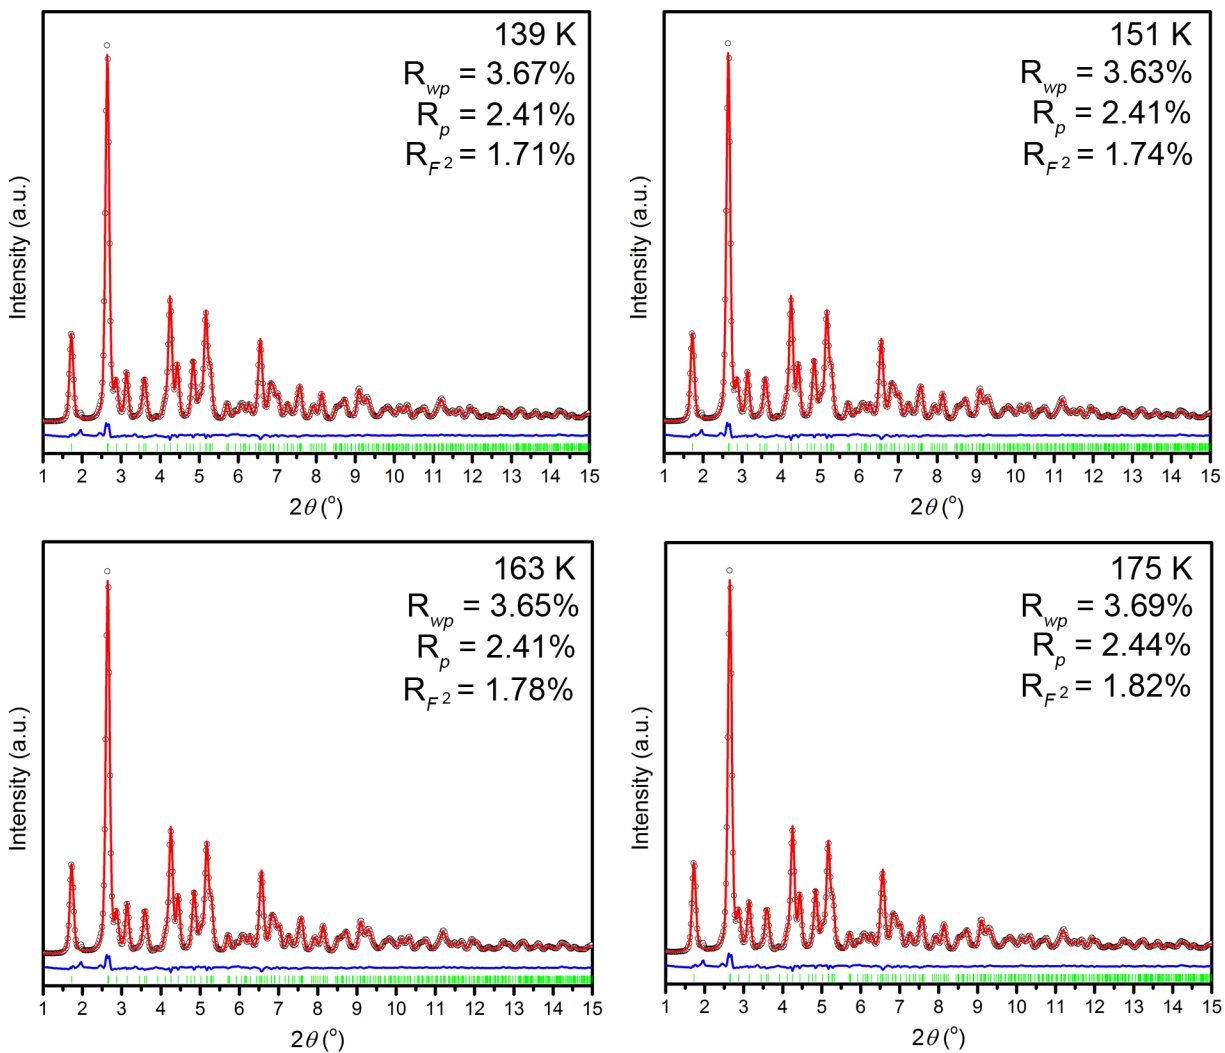

**Fig. S1** Rietveld analysis of X-ray total scattering data for  $\text{CaMoO}_4$  nanocrystals from 90–480 K. Experimental ( $\circ$ ) and calculated ( $\text{—}$ ) patterns are shown, along with the difference curve ( $\text{—}$ ) and tickmarks ( $|$ ) corresponding to the phase refined. The temperature at which the pattern was collected is indicated in the top right of each pattern, along with the associated  $R_{wp}$ .

—Continues on the following page.

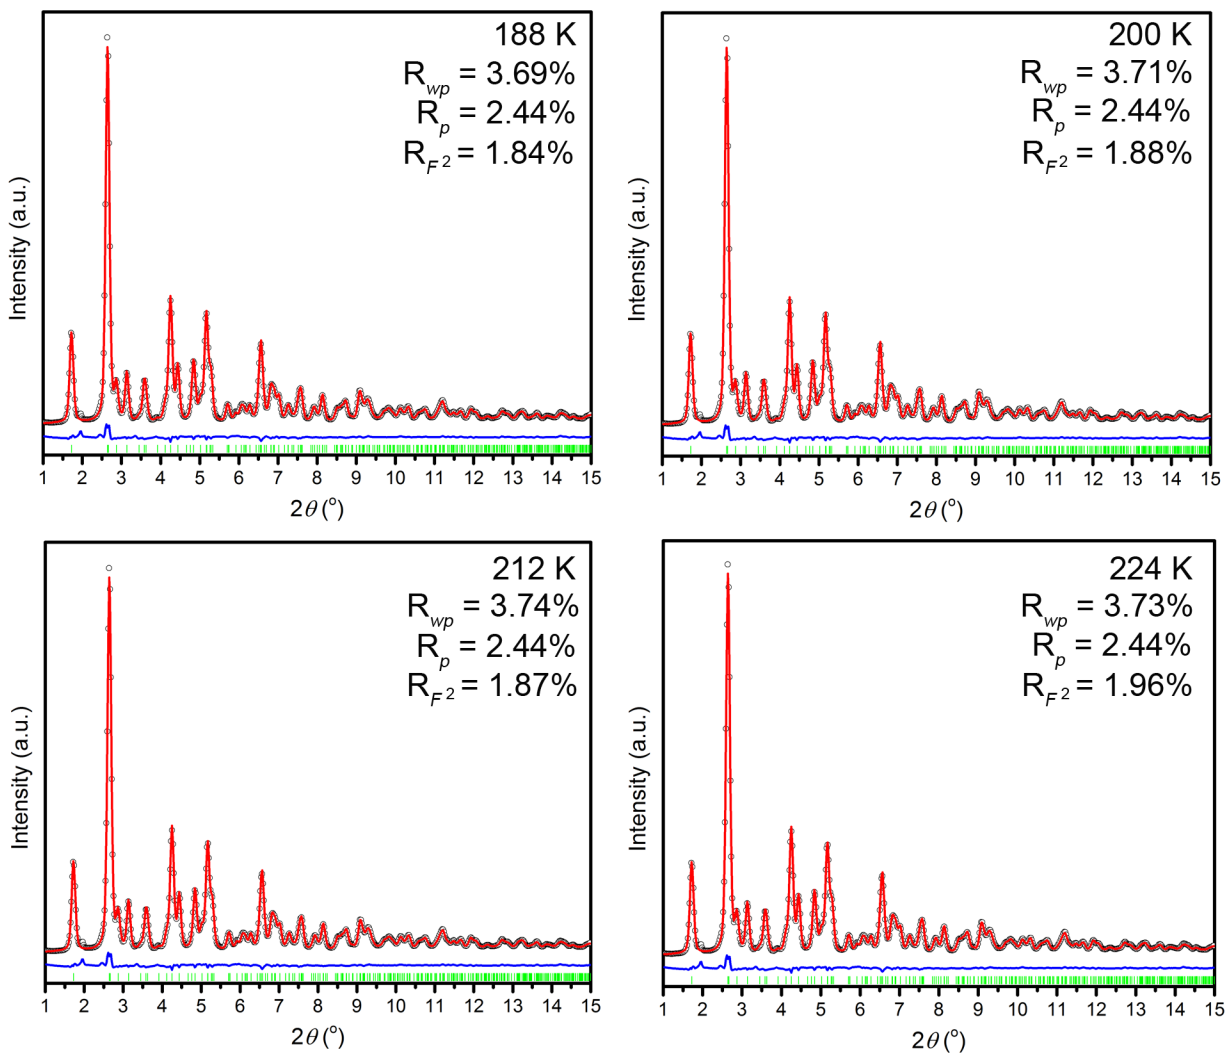

**Fig. S1** Rietveld analysis of X-ray total scattering data for CaMoO<sub>4</sub> nanocrystals from 90–480 K. Experimental (○) and calculated (—) patterns are shown, along with the difference curve (—) and tickmarks (|) corresponding to the phase refined. The temperature at which the pattern was collected is indicated in the top right of each pattern, along with the associated  $R_{wp}$ . —Continues on the following page.

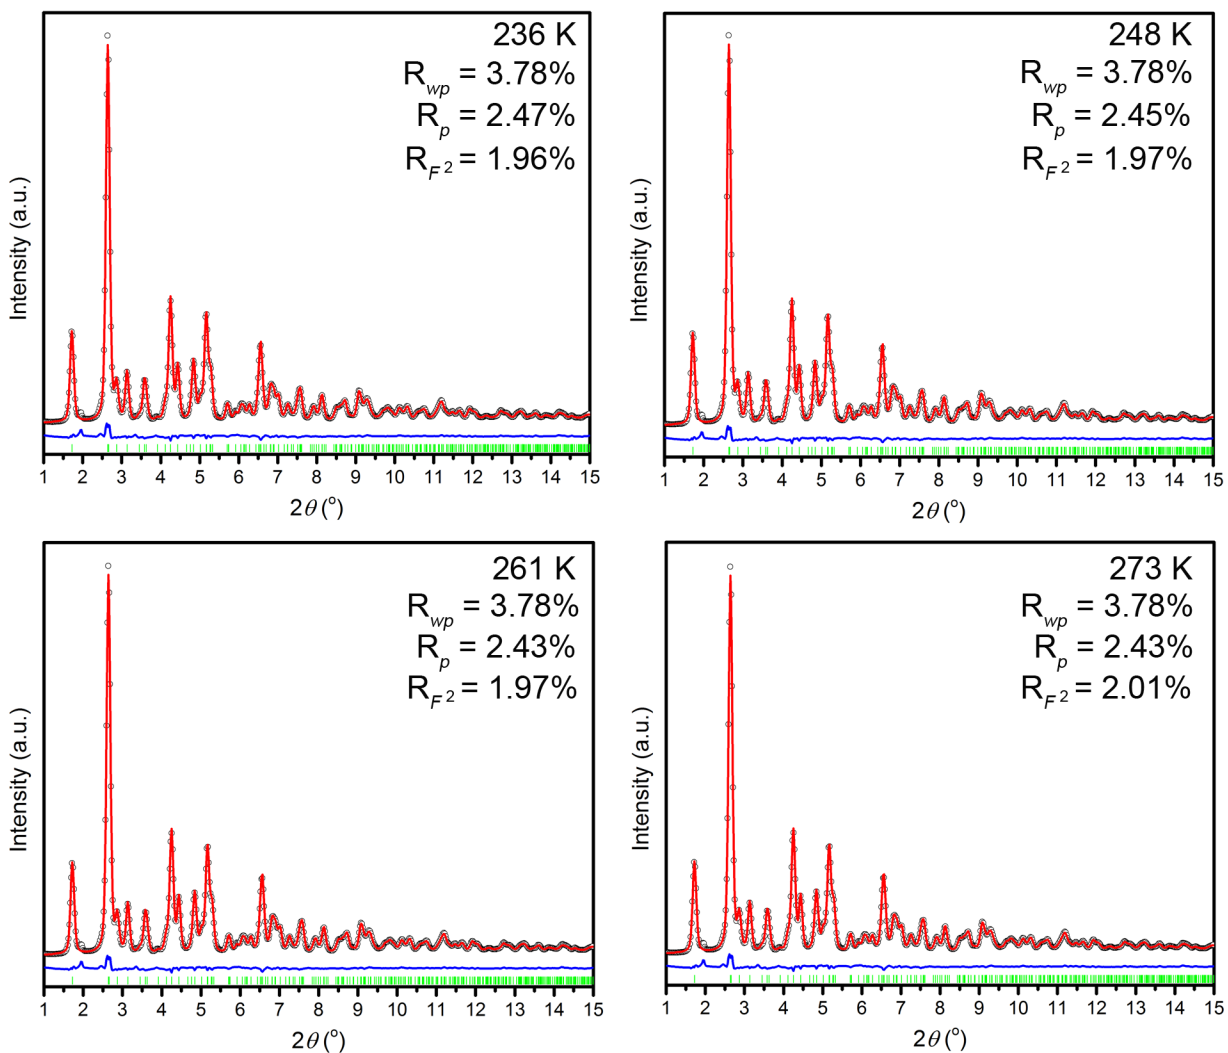

**Fig. S1** Rietveld analysis of X-ray total scattering data for  $\text{CaMoO}_4$  nanocrystals from 90–480 K. Experimental ( $\circ$ ) and calculated ( $—$ ) patterns are shown, along with the difference curve ( $—$ ) and tickmarks ( $|$ ) corresponding to the phase refined. The temperature at which the pattern was collected is indicated in the top right of each pattern, along with the associated  $R_{wp}$ .  
 —Continues on the following page.

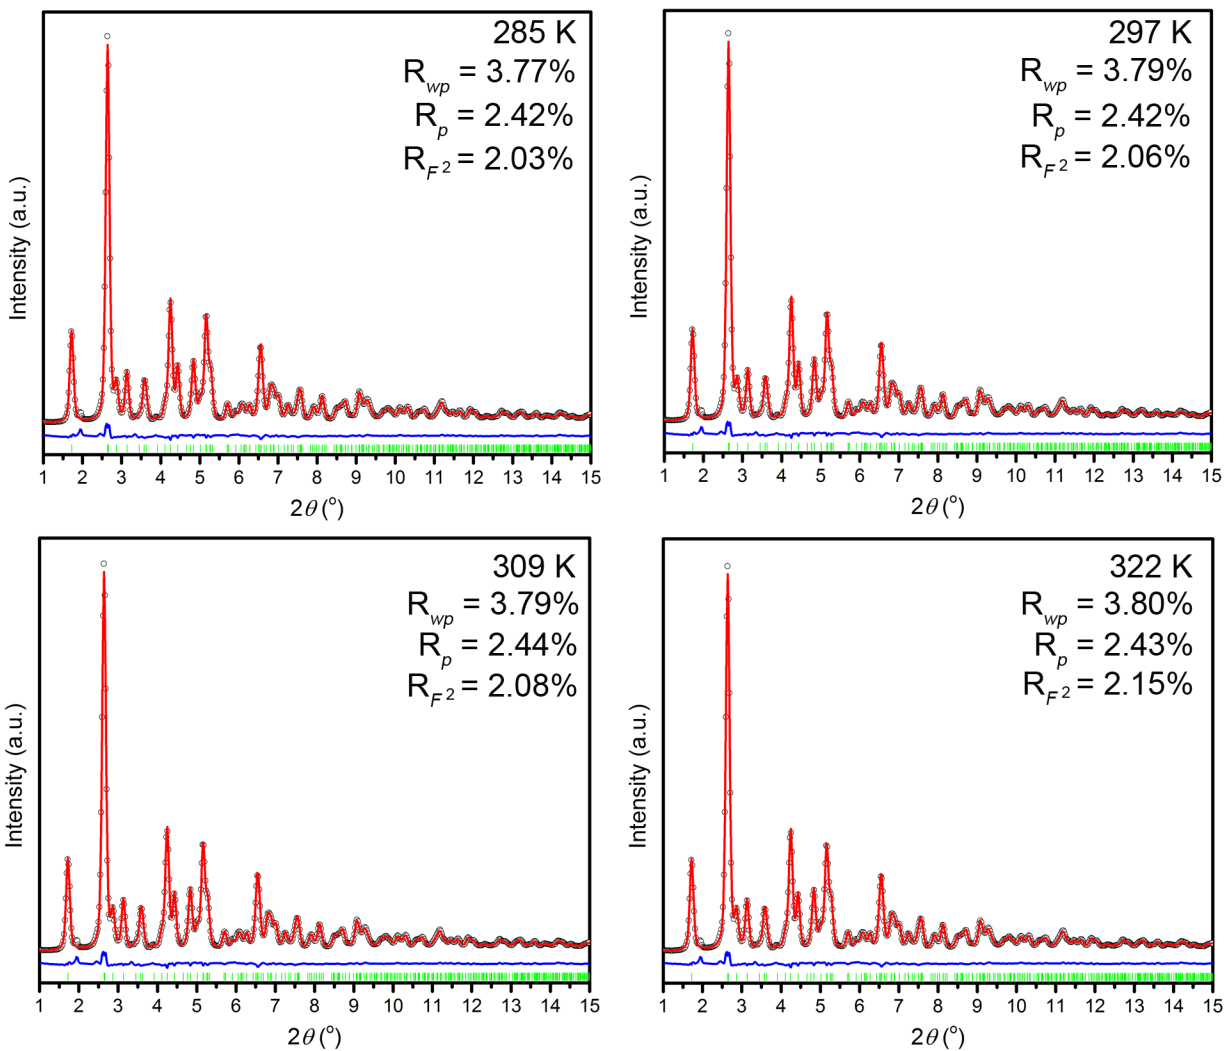

**Fig. S1** Rietveld analysis of X-ray total scattering data for  $\text{CaMoO}_4$  nanocrystals from 90–480 K. Experimental ( $\circ$ ) and calculated ( $—$ ) patterns are shown, along with the difference curve ( $—$ ) and tickmarks ( $|$ ) corresponding to the phase refined. The temperature at which the pattern was collected is indicated in the top right of each pattern, along with the associated  $R_{wp}$ .  
 —Continues on the following page.



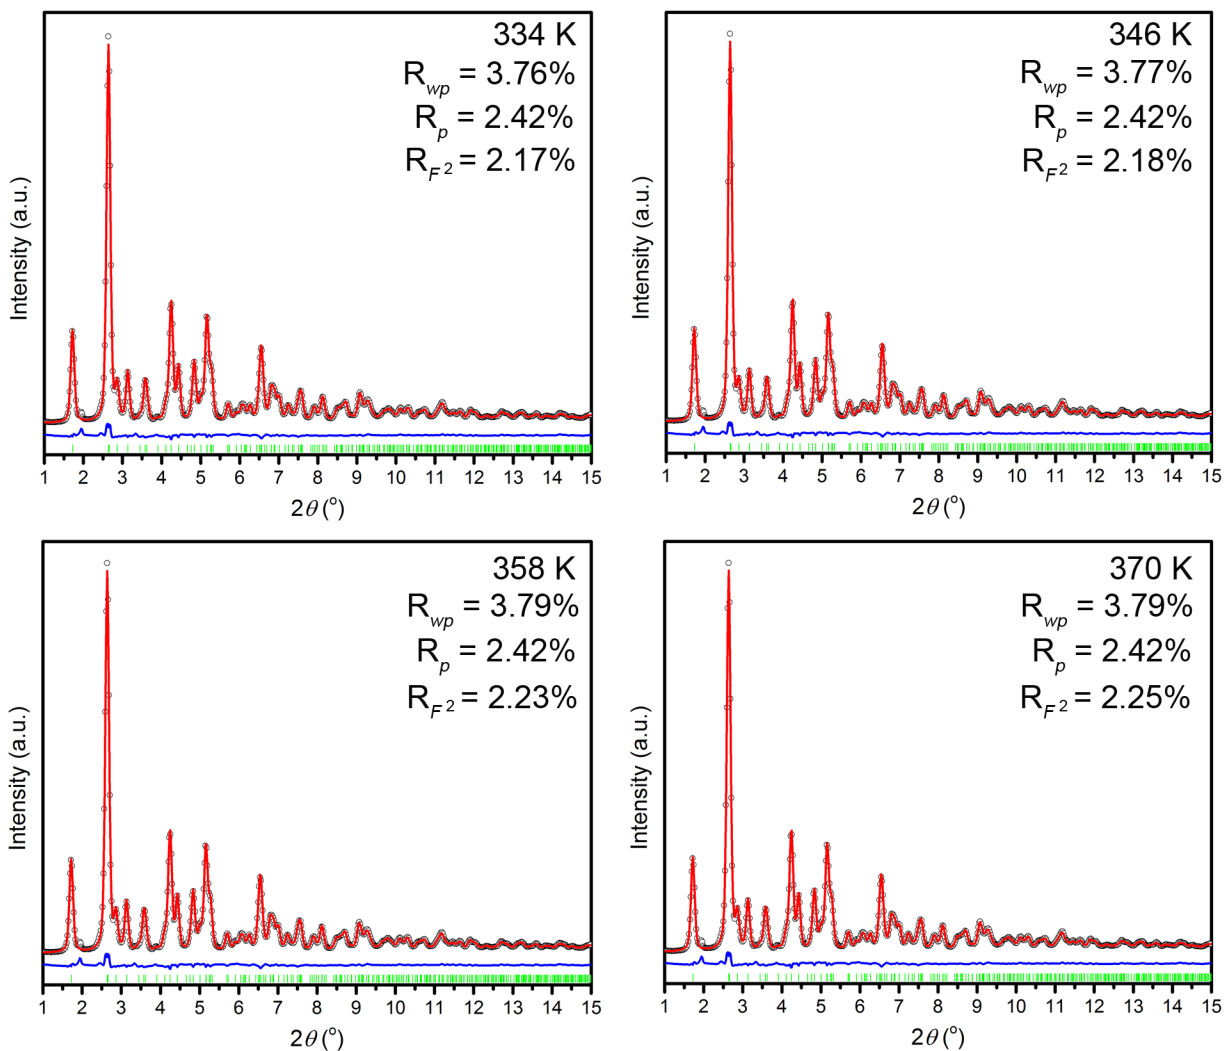

**Fig. S1** Rietveld analysis of X-ray total scattering data for  $\text{CaMoO}_4$  nanocrystals from 90–480 K. Experimental ( $\circ$ ) and calculated ( $\text{—}$ ) patterns are shown, along with the difference curve ( $\text{—}$ ) and tickmarks ( $|$ ) corresponding to the phase refined. The temperature at which the pattern was collected is indicated in the top right of each pattern, along with the associated  $R_{wp}$ .  
 —Continues on the following page.

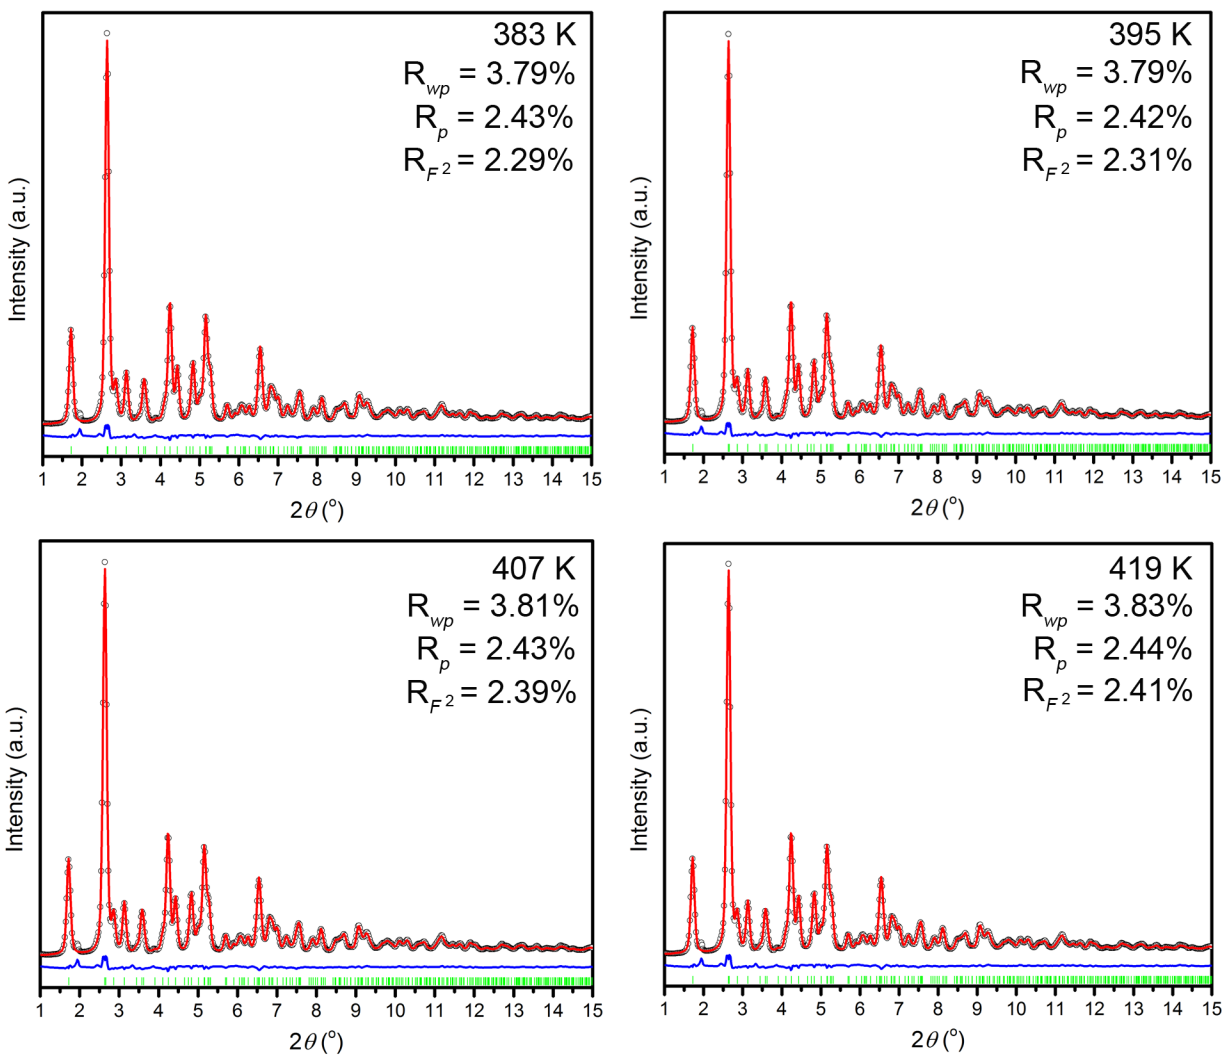

**Fig. S1** Rietveld analysis of X-ray total scattering data for  $\text{CaMoO}_4$  nanocrystals from 90–480 K. Experimental ( $\circ$ ) and calculated ( $—$ ) patterns are shown, along with the difference curve ( $—$ ) and tickmarks ( $|$ ) corresponding to the phase refined. The temperature at which the pattern was collected is indicated in the top right of each pattern, along with the associated  $R_{wp}$ .  
 —Continues on the following page.

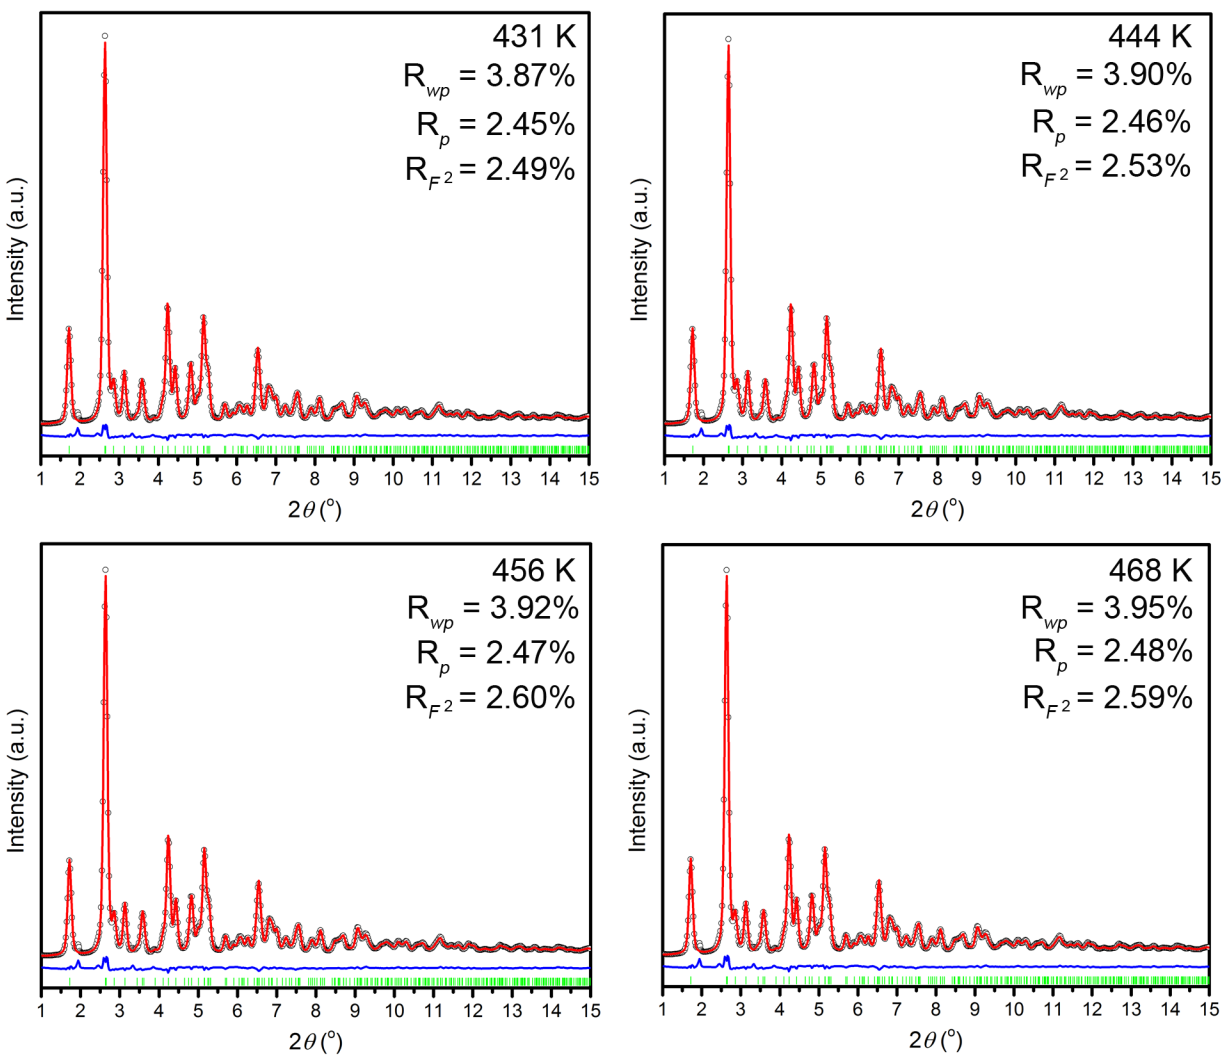

**Fig. S1** Rietveld analysis of X-ray total scattering data for  $\text{CaMoO}_4$  nanocrystals from 90–480 K. Experimental ( $\circ$ ) and calculated ( $\text{—}$ ) patterns are shown, along with the difference curve ( $\text{—}$ ) and tickmarks ( $|$ ) corresponding to the phase refined. The temperature at which the pattern was collected is indicated in the top right of each pattern, along with the associated  $R_{wp}$ .  
 —Continues on the following page.

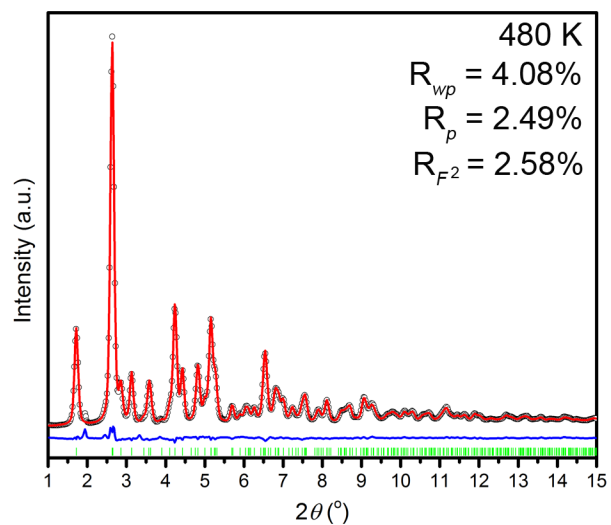

**Fig. S1** Rietveld analysis of X-ray total scattering data for  $\text{CaMoO}_4$  nanocrystals from 90–480 K. Experimental ( $\circ$ ) and calculated ( $\text{—}$ ) patterns are shown, along with the difference curve ( $\text{—}$ ) and tickmarks ( $|$ ) corresponding to the phase refined. The temperature at which the pattern was collected is indicated in the top right of each pattern, along with the associated  $R_{wp}$ .  
 —Continues on the following page.

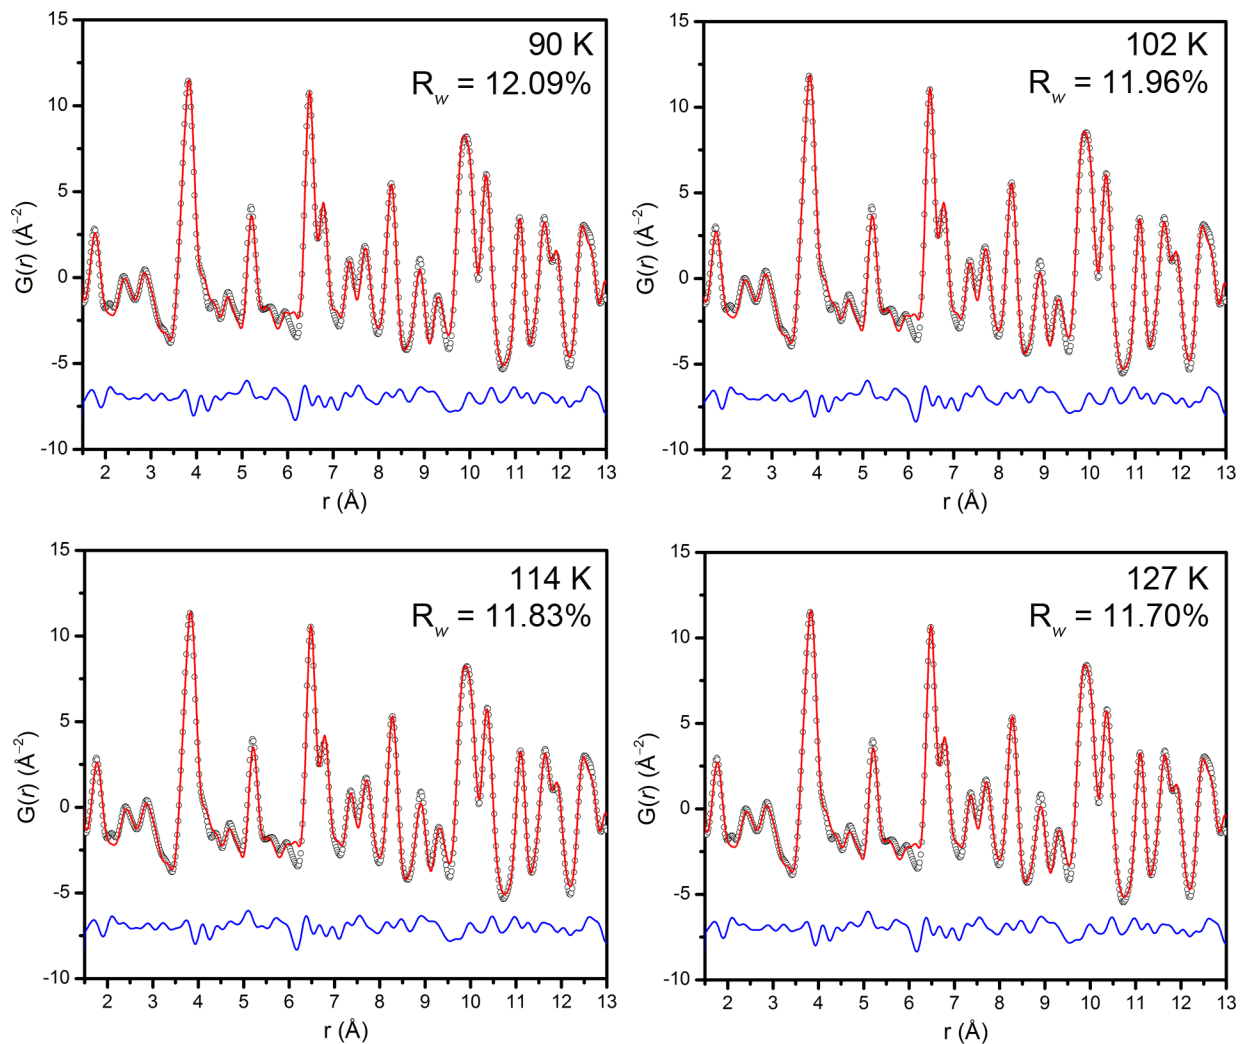

**Fig. S2** PDF analysis of X-ray total scattering data for  $\text{CaMoO}_4$  nanocrystals from 90–480 K. Experimental ( $\circ$ ) and calculated ( $\text{—}$ ) patterns are shown, along with the difference curve ( $\text{—}$ ). The temperature at which the pattern was collected is indicated in the top right of each pattern, along with the associated  $R_w$ . —Continues on the following page.

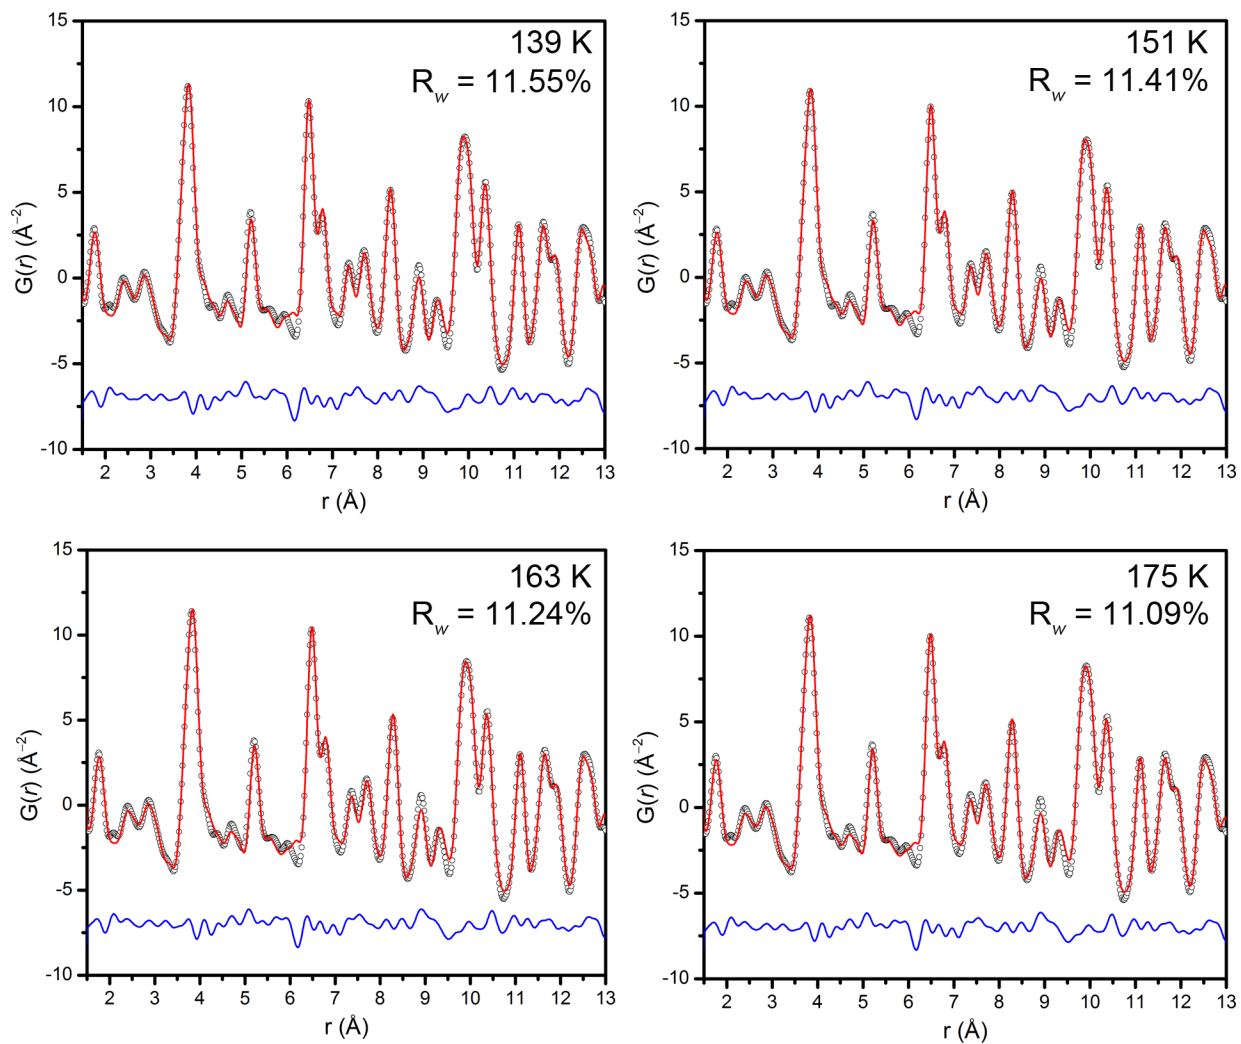

**Fig. S2** PDF analysis of X-ray total scattering data for  $\text{CaMoO}_4$  nanocrystals from 90–480 K. Experimental ( $\circ$ ) and calculated ( $\text{—}$ ) patterns are shown, along with the difference curve ( $\text{—}$ ). The temperature at which the pattern was collected is indicated in the top right of each pattern, along with the associated  $R_w$ . —Continues on the following page.

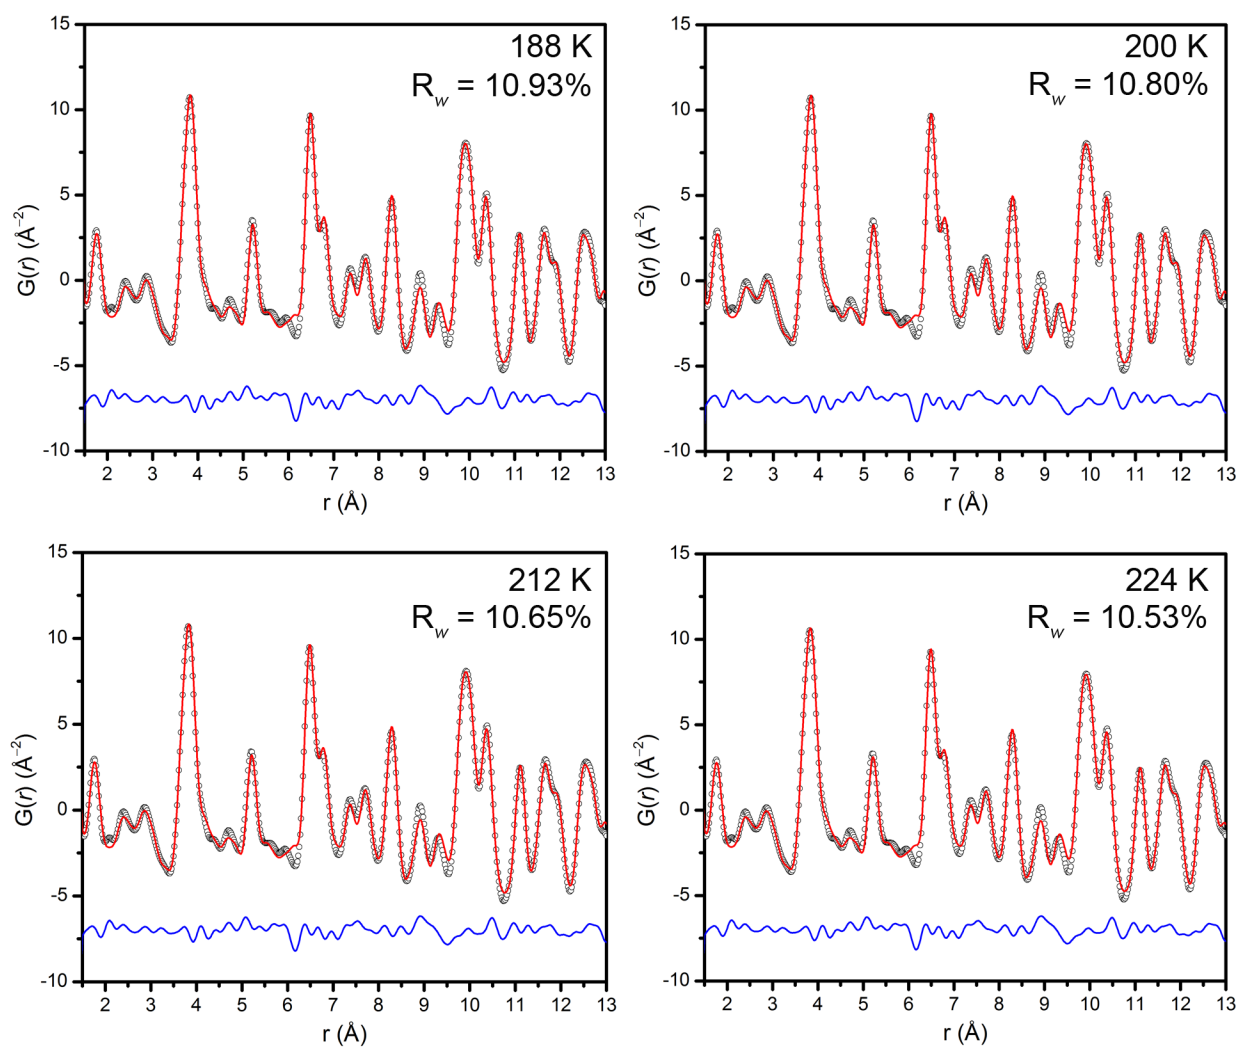

**Fig. S2** PDF analysis of X-ray total scattering data for  $\text{CaMoO}_4$  nanocrystals from 90–480 K. Experimental ( $\circ$ ) and calculated ( $\text{—}$ ) patterns are shown, along with the difference curve ( $\text{—}$ ). The temperature at which the pattern was collected is indicated in the top right of each pattern, along with the associated  $R_w$ . —Continues on the following page.

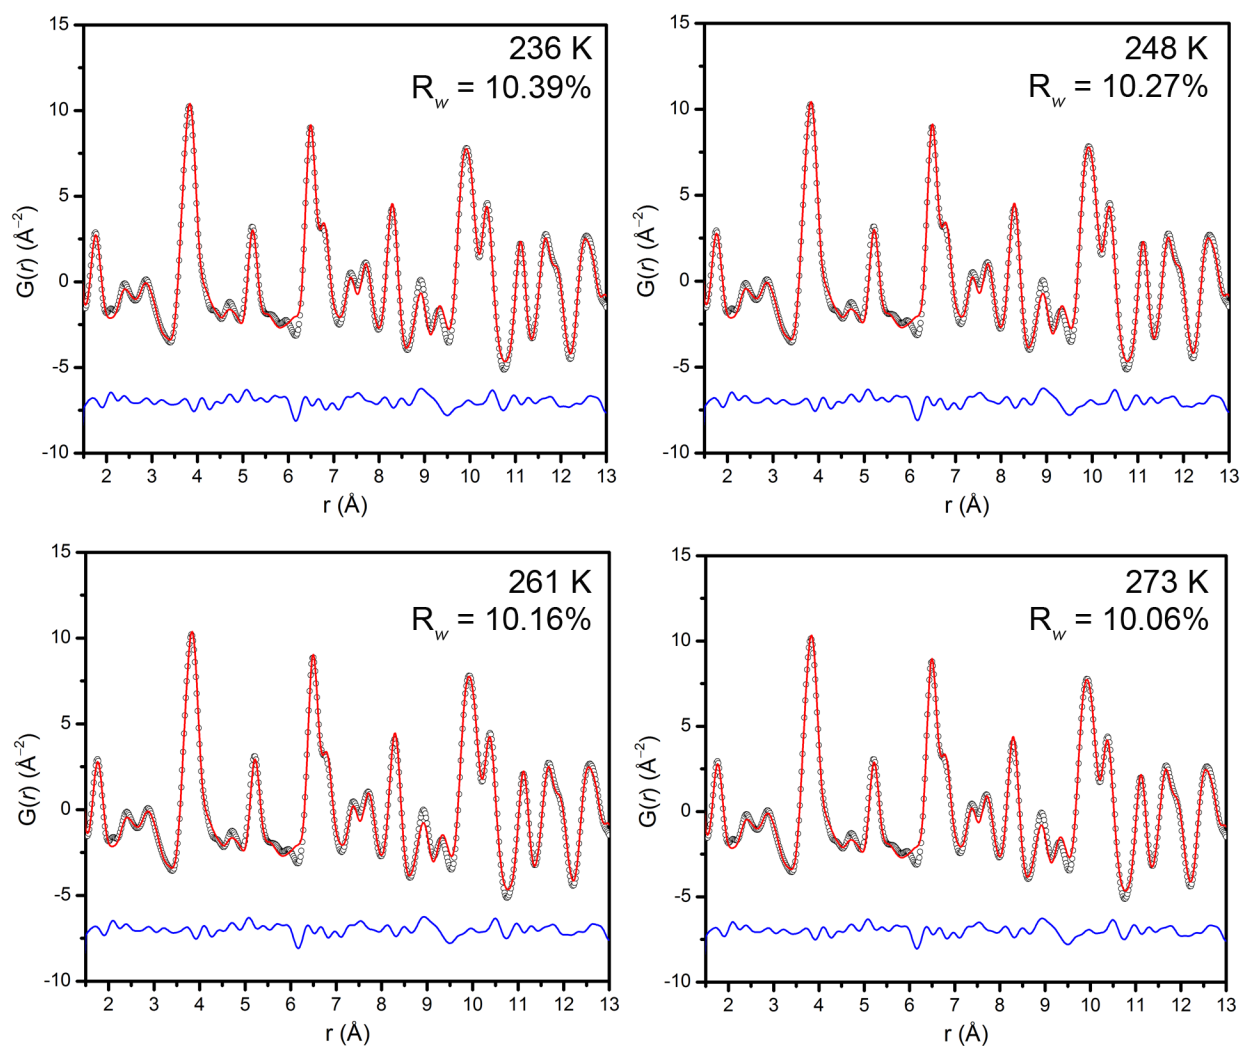

**Fig. S2** PDF analysis of X-ray total scattering data for  $\text{CaMoO}_4$  nanocrystals from 90–480 K. Experimental ( $\circ$ ) and calculated ( $\text{—}$ ) patterns are shown, along with the difference curve ( $\text{—}$ ). The temperature at which the pattern was collected is indicated in the top right of each pattern, along with the associated  $R_w$ . —Continues on the following page.



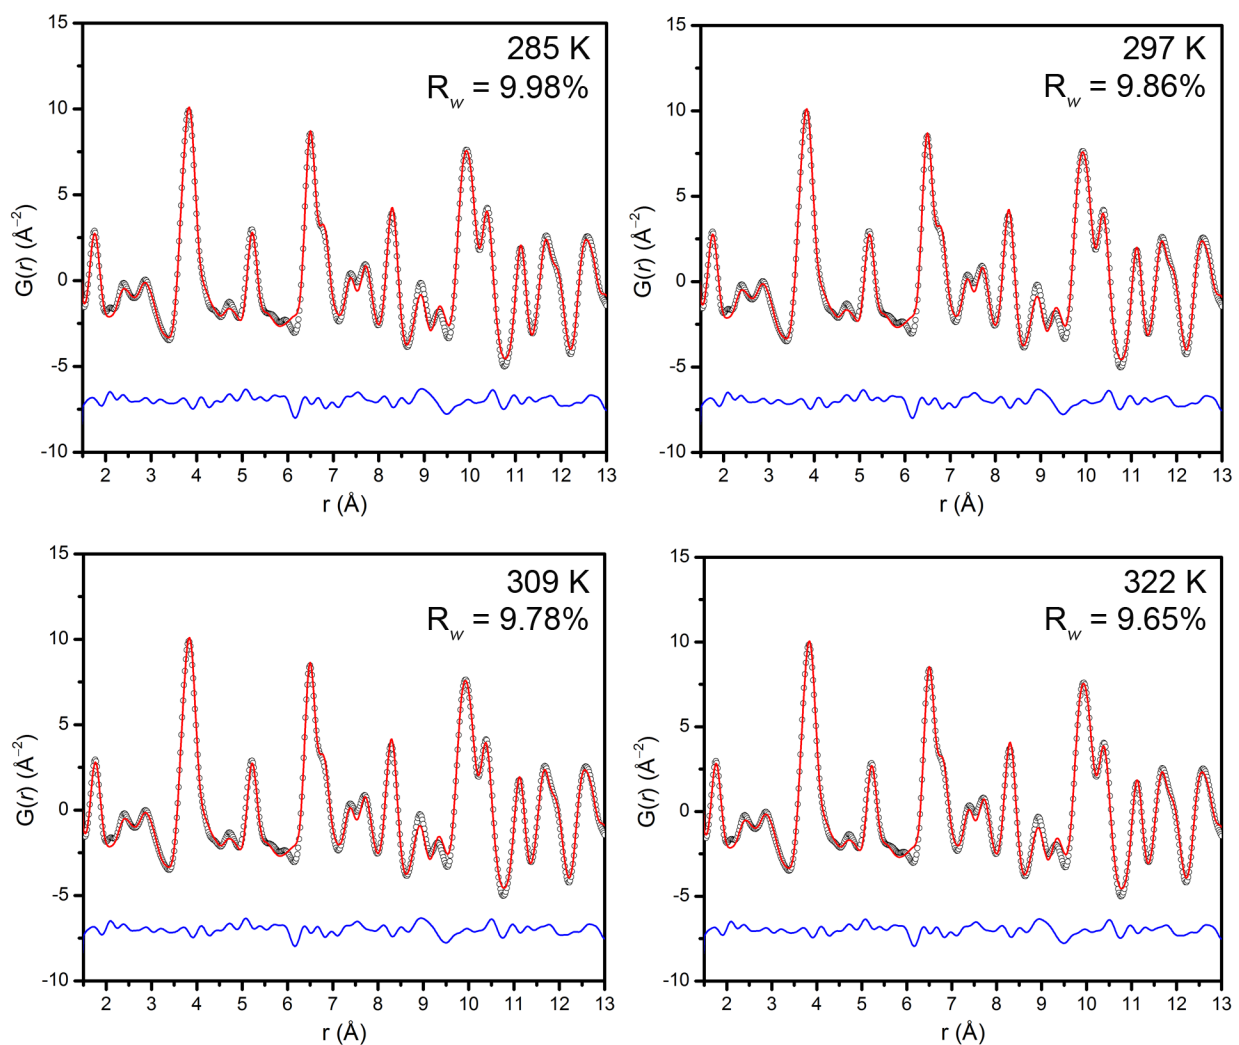

**Fig. S2** PDF analysis of X-ray total scattering data for  $\text{CaMoO}_4$  nanocrystals from 90–480 K. Experimental ( $\circ$ ) and calculated ( $\text{—}$ ) patterns are shown, along with the difference curve ( $\text{—}$ ). The temperature at which the pattern was collected is indicated in the top right of each pattern, along with the associated  $R_w$ . —Continues on the following page.

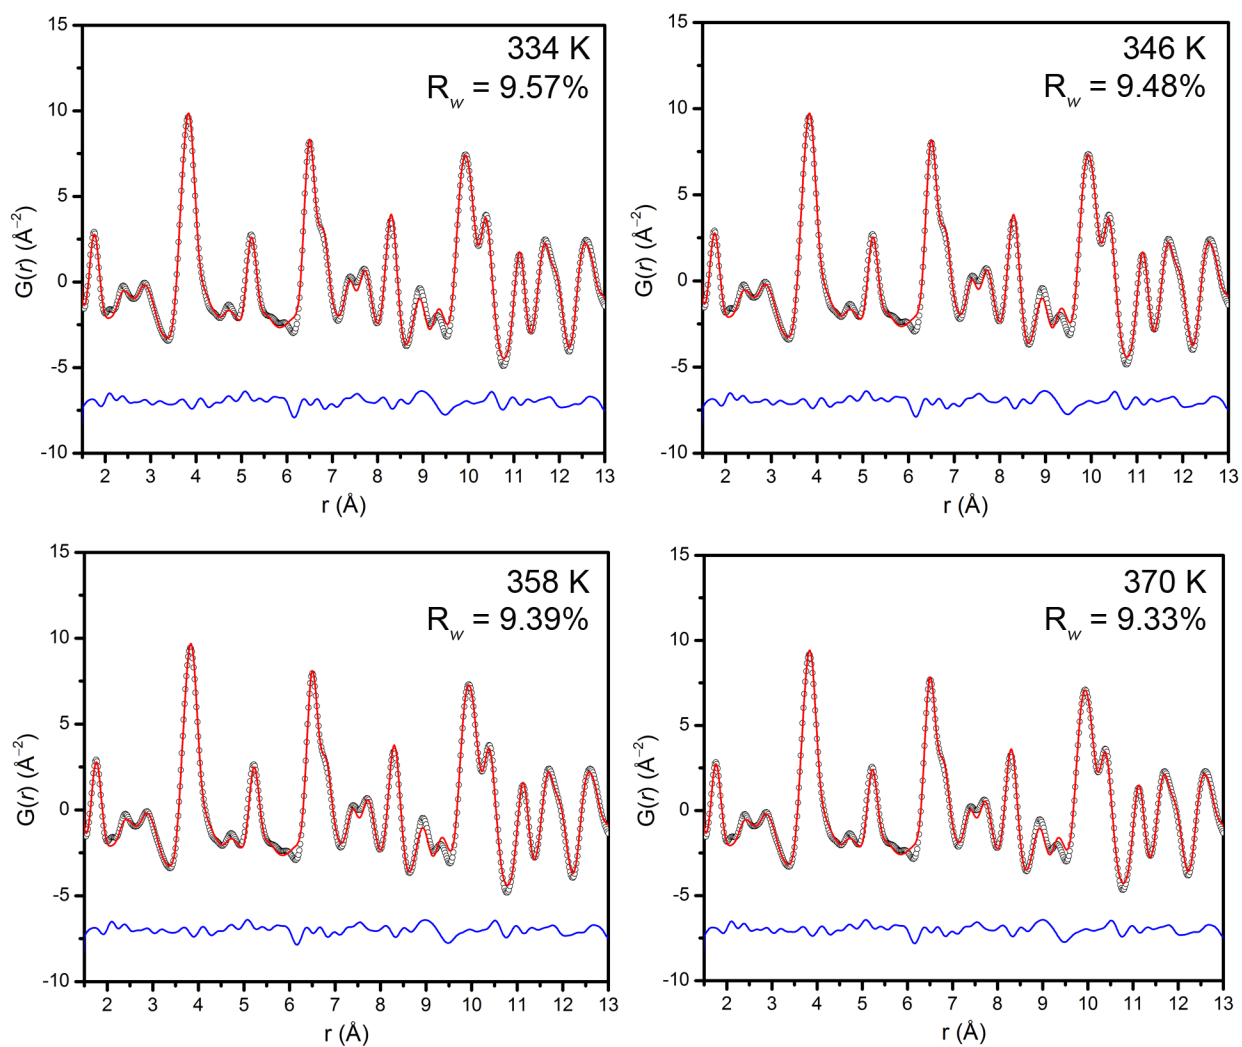

**Fig. S2** PDF analysis of X-ray total scattering data for  $\text{CaMoO}_4$  nanocrystals from 90–480 K. Experimental ( $\circ$ ) and calculated ( $\text{—}$ ) patterns are shown, along with the difference curve ( $\text{—}$ ). The temperature at which the pattern was collected is indicated in the top right of each pattern, along with the associated  $R_w$ . —Continues on the following page.

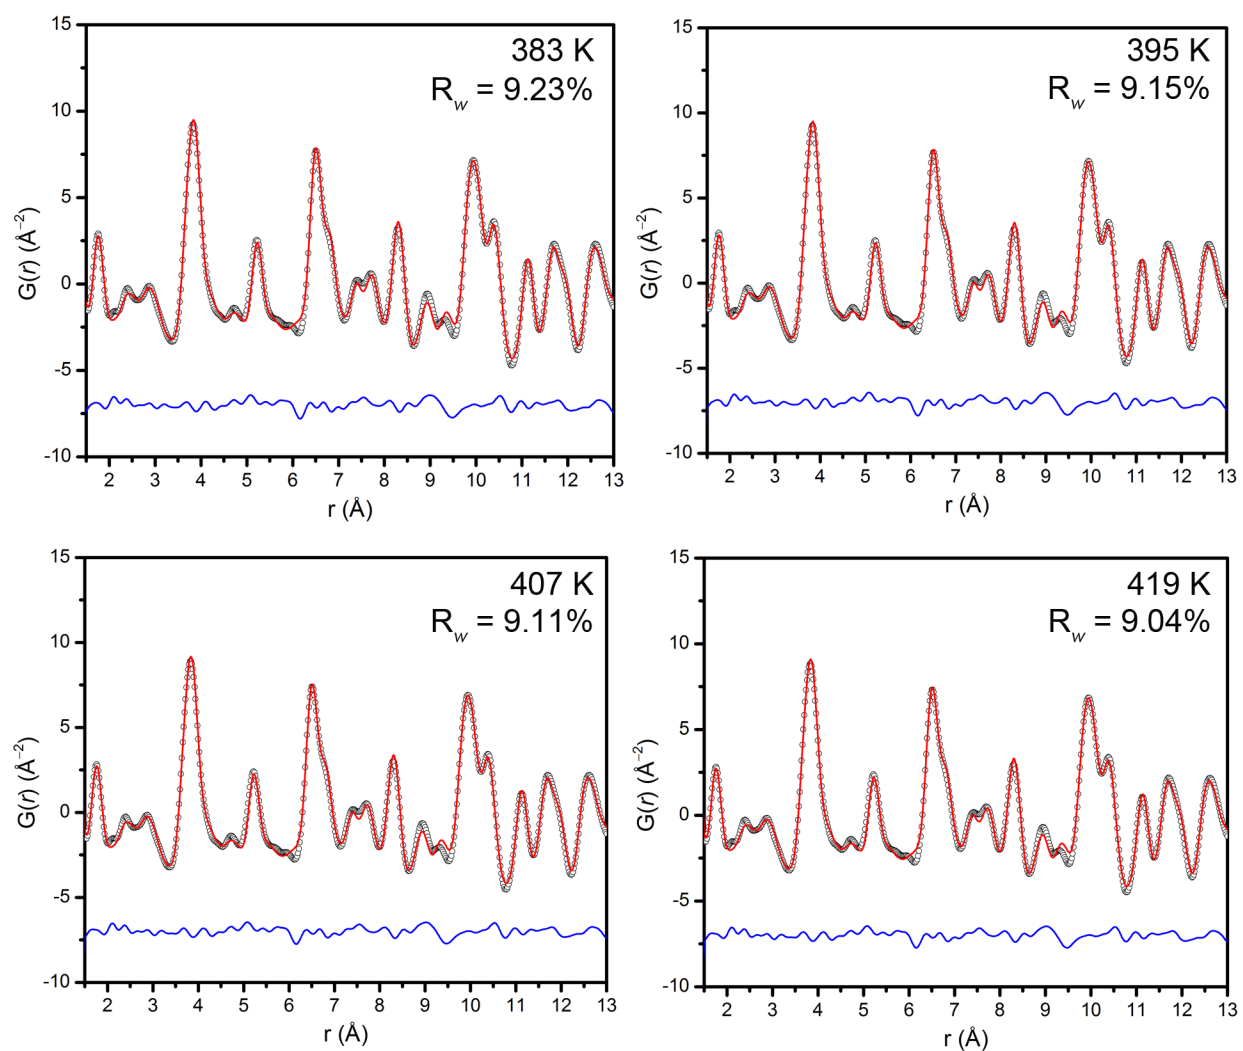

**Fig. S2** PDF analysis of X-ray total scattering data for  $\text{CaMoO}_4$  nanocrystals from 90–480 K. Experimental ( $\circ$ ) and calculated ( $\text{—}$ ) patterns are shown, along with the difference curve ( $\text{—}$ ). The temperature at which the pattern was collected is indicated in the top right of each pattern, along with the associated  $R_w$ . —Continues on the following page.

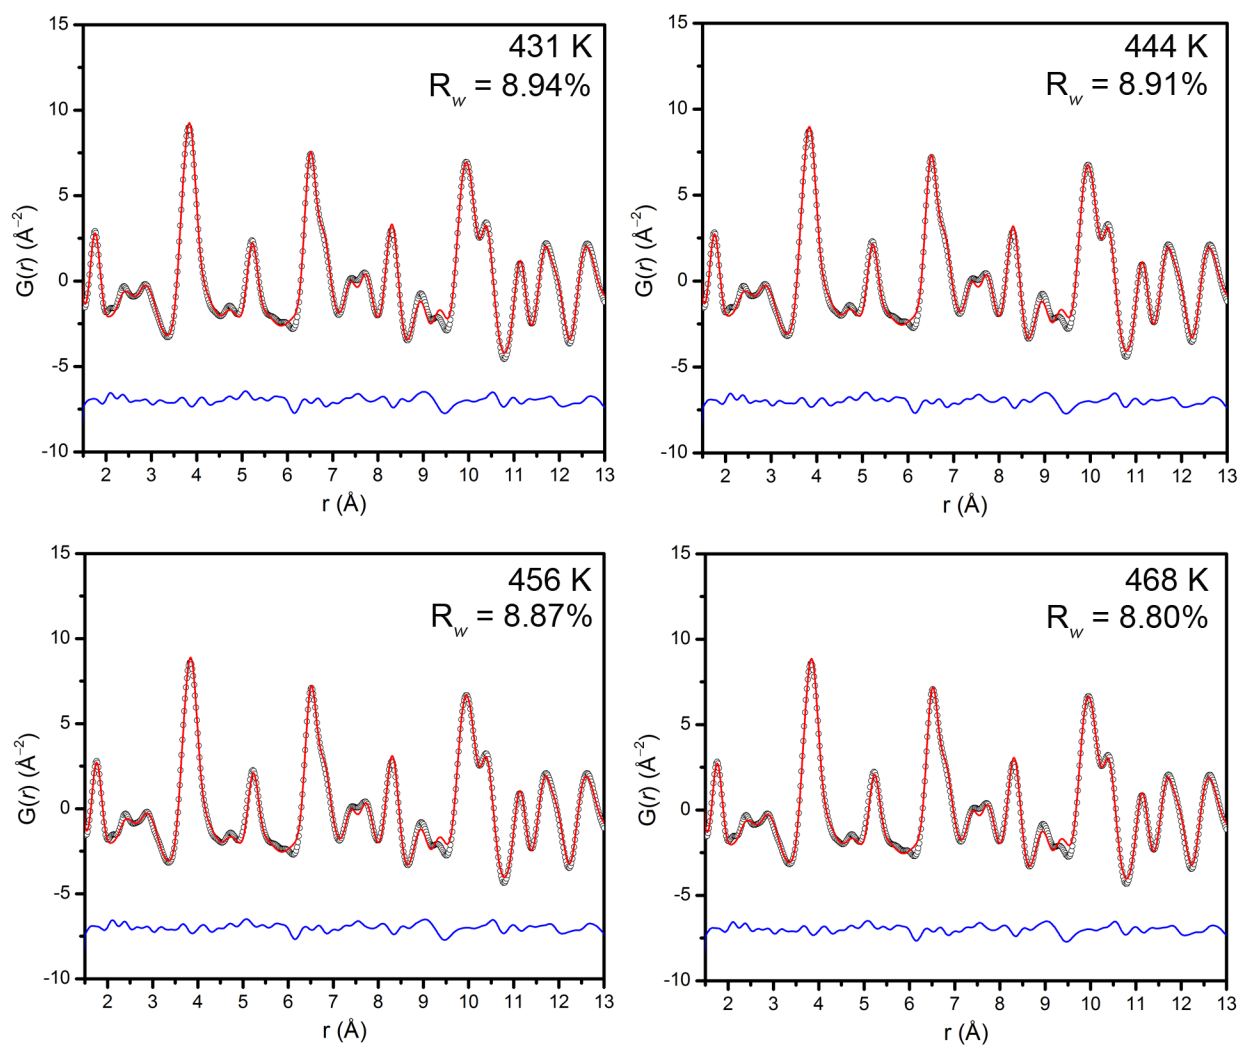

**Fig. S2** PDF analysis of X-ray total scattering data for  $\text{CaMoO}_4$  nanocrystals from 90–480 K. Experimental ( $\circ$ ) and calculated ( $\text{—}$ ) patterns are shown, along with the difference curve ( $\text{—}$ ). The temperature at which the pattern was collected is indicated in the top right of each pattern, along with the associated  $R_w$ . —Continues on the following page.

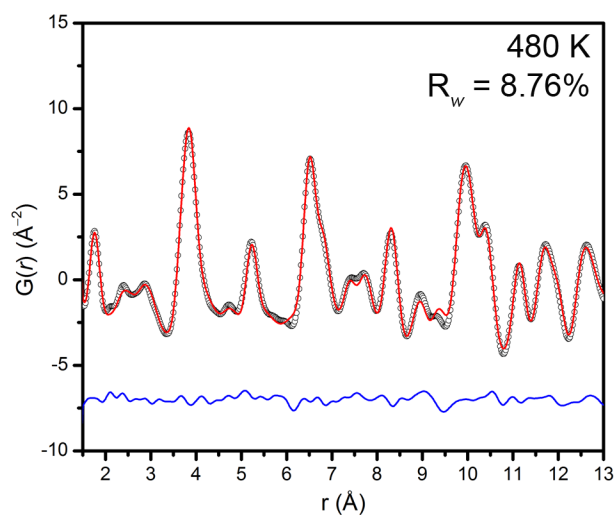

**Fig. S2** PDF analysis of X-ray total scattering data for  $\text{CaMoO}_4$  nanocrystals from 90–480 K. Experimental ( $\circ$ ) and calculated ( $\text{—}$ ) patterns are shown, along with the difference curve ( $\text{—}$ ). The temperature at which the pattern was collected is indicated in the top right of each pattern, along with the associated  $R_w$ .

**Table S1** Structural Parameters of CaMoO<sub>4</sub> Nanocrystals From 90–480 K Extracted FromRietveld Analysis —*Continues on the following page*

|                                                     | 90 K            | 102 K           | 114 K           | 127 K           | 139 K           |
|-----------------------------------------------------|-----------------|-----------------|-----------------|-----------------|-----------------|
| $a$ (Å)                                             | 5.2181(4)       | 5.2185(4)       | 5.2188(4)       | 5.2192(4)       | 5.2197(4)       |
| $c$ (Å)                                             | 11.404(1)       | 11.406(1)       | 11.407(1)       | 11.408(1)       | 11.410(1)       |
| $V$ (Å <sup>3</sup> )                               | 310.53(7)       | 310.60(7)       | 310.68(7)       | 310.76(7)       | 310.86(7)       |
| $x_o$                                               | 0.6470(7)       | 0.6470(7)       | 0.6470(7)       | 0.6469(7)       | 0.6468(7)       |
| $y_o$                                               | 0.5124(7)       | 0.5125(7)       | 0.5125(7)       | 0.5126(7)       | 0.5126(7)       |
| $z_o$                                               | 0.2090(4)       | 0.2090(4)       | 0.2090(4)       | 0.2090(4)       | 0.2090(4)       |
| Ca: $U^{11}, U^{33}$ (Å <sup>2</sup> ) <sup>a</sup> | 0.3, 0.7        | 0.3, 0.7        | 0.4, 0.7        | 0.4, 0.7        | 0.4, 0.8        |
| $U_{eq}$ (Å <sup>2</sup> )                          | 0.4             | 0.4             | 0.5             | 0.5             | 0.3             |
| Mo: $U^{11}, U^{33}$ (Å <sup>2</sup> )              | 0.2, 0.4        | 0.3, 0.4        | 0.3, 0.4        | 0.3, 0.5        | 0.3, 0.5        |
| $U_{eq}$ (Å <sup>2</sup> )                          | 0.3             | 0.3             | 0.3             | 0.4             | 0.4             |
| O: $U^{11}, U^{22}, U^{33}$ (Å <sup>2</sup> )       | 0.6, 0.4, 1.5   | 0.7, 0.4, 1.5   | 0.7, 0.5, 1.5   | 0.7, 0.5, 1.6   | 0.7, 0.5, 1.6   |
| $U^{12}, U^{13}, U^{23}$ (Å <sup>2</sup> )          | -0.3, 0.3, -0.1 | -0.3, 0.3, -0.1 | -0.3, 0.3, -0.2 | -0.3, 0.3, -0.1 | -0.3, 0.3, -0.2 |
| $U_{eq}$ (Å <sup>2</sup> )                          | 0.8             | 0.9             | 0.9             | 0.9             | 0.9             |
| Ca–O (1) (Å)                                        | 2.459(4)        | 2.459(4)        | 2.460(4)        | 2.460(4)        | 2.461(4)        |
| Ca–O (2) (Å)                                        | 2.487(4)        | 2.487(4)        | 2.487(4)        | 2.488(4)        | 2.489(4)        |
| $V_{CaO_8}$ (Å <sup>3</sup> )                       | 26.88           | 26.89           | 26.90           | 26.92           | 26.93           |
| $\Delta_{AO_8}$ ( $\times 10^3$ )                   | 5.6             | 5.6             | 5.5             | 5.7             | 5.8             |
| Mo–O (Å)                                            | 1.745(3)        | 1.745(3)        | 1.744(3)        | 1.744(3)        | 1.744(3)        |
| $V_{MoO_4}$ (Å <sup>3</sup> )                       | 2.71            | 2.71            | 2.71            | 2.71            | 2.71            |
| Ca–O–Mo (1) (°)                                     | 120.4(2)        | 120.4(2)        | 120.4(2)        | 120.4(2)        | 120.4(2)        |
| Ca–O–Mo (2) (°)                                     | 132.9(2)        | 133.0(2)        | 132.9(2)        | 133.0(2)        | 133.0(2)        |

<sup>a</sup> Atomic displacements parameters are given as  $100 \times U^{ij}$ .

**Table S1** Structural Parameters of CaMoO<sub>4</sub> Nanocrystals From 90–480 K Extracted FromRietveld Analysis — *Continues on the following page*

|                                                     | 151 K           | 163 K           | 175 K           | 188 K           | 200 K           |
|-----------------------------------------------------|-----------------|-----------------|-----------------|-----------------|-----------------|
| $a$ (Å)                                             | 5.2202(4)       | 5.2207(4)       | 5.2213(5)       | 5.2218(5)       | 5.2224(5)       |
| $c$ (Å)                                             | 11.411(1)       | 11.413(1)       | 11.415(1)       | 11.417(1)       | 11.419(1)       |
| $V$ (Å <sup>3</sup> )                               | 310.96(7)       | 311.07(7)       | 311.19(7)       | 311.30(7)       | 311.42(7)       |
| $x_o$                                               | 0.6469(7)       | 0.6467(8)       | 0.6467(8)       | 0.6466(8)       | 0.6466(8)       |
| $y_o$                                               | 0.5126(7)       | 0.5126(7)       | 0.5127(7)       | 0.5128(7)       | 0.5128(7)       |
| $z_o$                                               | 0.2090(4)       | 0.2090(4)       | 0.2090(4)       | 0.2090(4)       | 0.2090(4)       |
| Ca: $U^{11}, U^{33}$ (Å <sup>2</sup> ) <sup>a</sup> | 0.4, 0.8        | 0.4, 0.8        | 0.4, 0.8        | 0.4, 0.9        | 0.5, 0.9        |
| $U_{eq}$ (Å <sup>2</sup> )                          | 0.5             | 0.5             | 0.5             | 0.6             | 0.6             |
| Mo: $U^{11}, U^{33}$ (Å <sup>2</sup> )              | 0.3, 0.5        | 0.3, 0.5        | 0.4, 0.6        | 0.4, 0.6        | 0.4, 0.6        |
| $U_{eq}$ (Å <sup>2</sup> )                          | 0.4             | 0.4             | 0.5             | 0.5             | 0.5             |
| O: $U^{11}, U^{22}, U^{33}$ (Å <sup>2</sup> )       | 0.7, 0.5, 1.6   | 0.8, 0.5, 1.7   | 0.8, 0.5, 1.7   | 0.9, 0.5, 1.7   | 0.9, 0.6, 1.8   |
| $U^{12}, U^{13}, U^{23}$ (Å <sup>2</sup> )          | -0.3, 0.3, -0.2 | -0.3, 0.3, -0.1 | -0.3, 0.3, -0.1 | -0.3, 0.3, -0.1 | -0.3, 0.3, -0.1 |
| $U_{eq}$ (Å <sup>2</sup> )                          | 0.9             | 1.0             | 1.0             | 1.0             | 1.1             |
| Ca–O (1) (Å)                                        | 2.461(4)        | 2.461(4)        | 2.462(4)        | 2.462(4)        | 2.463(4)        |
| Ca–O (2) (Å)                                        | 2.489(4)        | 2.490(4)        | 2.491(4)        | 2.491(4)        | 2.492(4)        |
| $V_{CaO_8}$ (Å <sup>3</sup> )                       | 26.94           | 26.96           | 26.98           | 27.00           | 27.01           |
| $\Delta_{AO_8}$ ( $\times 10^3$ )                   | 5.7             | 5.9             | 5.9             | 5.9             | 5.8             |
| Mo–O (Å)                                            | 1.744(3)        | 1.744(3)        | 1.744(3)        | 1.744(3)        | 1.744(3)        |
| $V_{MoO_4}$ (Å <sup>3</sup> )                       | 2.71            | 2.71            | 2.71            | 2.71            | 2.71            |
| Ca–O–Mo (1) (°)                                     | 120.4(2)        | 120.3(2)        | 120.3(2)        | 120.3(2)        | 120.3(2)        |
| Ca–O–Mo (2) (°)                                     | 133.0(2)        | 133.0(2)        | 133.0(2)        | 133.1(2)        | 133.1(2)        |

<sup>a</sup> Atomic displacements parameters are given as  $100 \times U^{ij}$ .

**Table S1** Structural Parameters of CaMoO<sub>4</sub> Nanocrystals From 90–480 K Extracted FromRietveld Analysis —*Continues on the following page*

|                                                     | 212 K           | 224 K           | 236 K           | 248 K          | 261 K          |
|-----------------------------------------------------|-----------------|-----------------|-----------------|----------------|----------------|
| $a$ (Å)                                             | 5.2230(5)       | 5.2236(5)       | 5.2242(5)       | 5.2248(5)      | 5.2254(5)      |
| $c$ (Å)                                             | 11.421(1)       | 11.423(1)       | 11.425(1)       | 11.427(2)      | 11.429(2)      |
| $V$ (Å <sup>3</sup> )                               | 311.56(8)       | 311.68(8)       | 311.81(8)       | 311.94(8)      | 312.06(8)      |
| $x_o$                                               | 0.6465(8)       | 0.6465(8)       | 0.6463(8)       | 0.6463(8)      | 0.6462(8)      |
| $y_o$                                               | 0.5129(7)       | 0.5129(7)       | 0.5130(7)       | 0.5131(7)      | 0.5131(7)      |
| $z_o$                                               | 0.2090(4)       | 0.2090(4)       | 0.2090(4)       | 0.2089(4)      | 0.2089(4)      |
| Ca: $U^{11}, U^{33}$ (Å <sup>2</sup> ) <sup>a</sup> | 0.5, 0.9        | 0.5, 1.0        | 0.5, 1.0        | 0.5, 1.0       | 0.5, 1.0       |
| $U_{eq}$ (Å <sup>2</sup> )                          | 0.6             | 0.7             | 0.7             | 0.7            | 0.7            |
| Mo: $U^{11}, U^{33}$ (Å <sup>2</sup> )              | 0.4, 0.6        | 0.5, 0.6        | 0.5, 0.7        | 0.5, 0.7       | 0.5, 0.7       |
| $U_{eq}$ (Å <sup>2</sup> )                          | 0.5             | 0.5             | 0.6             | 0.6            | 0.6            |
| O: $U^{11}, U^{22}, U^{33}$ (Å <sup>2</sup> )       | 0.9, 0.6, 1.8   | 0.9, 0.7, 1.8   | 1.0, 0.7, 1.8   | 1.0, 0.7, 1.9  | 1.0, 0.7, 1.9  |
| $U^{12}, U^{13}, U^{23}$ (Å <sup>2</sup> )          | -0.3, 0.3, -0.1 | -0.2, 0.3, -0.1 | -0.2, 0.3, -0.1 | -0.2, 0.3, 0.0 | -0.2, 0.3, 0.0 |
| $U_{eq}$ (Å <sup>2</sup> )                          | 1.1             | 1.1             | 1.2             | 1.2            | 1.2            |
| Ca–O (1) (Å)                                        | 2.463(4)        | 2.464(4)        | 2.464(4)        | 2.465(4)       | 2.465(4)       |
| Ca–O (2) (Å)                                        | 2.493(4)        | 2.493(4)        | 2.494(5)        | 2.495(5)       | 2.496(5)       |
| $V_{CaO_8}$ (Å <sup>3</sup> )                       | 27.04           | 27.05           | 27.08           | 27.10          | 27.12          |
| $\Delta_{AO_8}$ ( $\times 10^3$ )                   | 6.0             | 6.0             | 6.1             | 6.0            | 6.1            |
| Mo–O (Å)                                            | 1.743(3)        | 1.743(3)        | 1.743(4)        | 1.743(4)       | 1.742(4)       |
| $V_{MoO_4}$ (Å <sup>3</sup> )                       | 2.71            | 2.71            | 2.71            | 2.71           | 2.71           |
| Ca–O–Mo (1) (°)                                     | 120.3(2)        | 120.3(2)        | 120.3(2)        | 120.3(2)       | 120.3(2)       |
| Ca–O–Mo (2) (°)                                     | 133.1(2)        | 133.1(2)        | 133.1(2)        | 133.1(2)       | 133.2(2)       |

<sup>a</sup> Atomic displacements parameters are given as  $100 \times U^{ij}$ .



**Table S1** Structural Parameters of CaMoO<sub>4</sub> Nanocrystals From 90–480 K Extracted FromRietveld Analysis —*Continues on the following page*

|                                                     | 273 K          | 285 K          | 297 K          | 309 K          | 322 K          |
|-----------------------------------------------------|----------------|----------------|----------------|----------------|----------------|
| $a$ (Å)                                             | 5.2259(5)      | 5.2265(5)      | 5.2270(5)      | 5.2278(5)      | 5.2284(5)      |
| $c$ (Å)                                             | 11.431(2)      | 11.433(2)      | 11.435(2)      | 11.437(2)      | 11.440(2)      |
| $V$ (Å <sup>3</sup> )                               | 312.18(8)      | 312.31(8)      | 312.42(8)      | 312.56(8)      | 312.73(8)      |
| $x_o$                                               | 0.6462(8)      | 0.6461(8)      | 0.6461(8)      | 0.6460(8)      | 0.6459(8)      |
| $y_o$                                               | 0.5132(7)      | 0.5132(7)      | 0.5133(7)      | 0.5133(7)      | 0.5134(7)      |
| $z_o$                                               | 0.2089(4)      | 0.2089(4)      | 0.2089(4)      | 0.2089(4)      | 0.2089(4)      |
| Ca: $U^{11}, U^{33}$ (Å <sup>2</sup> ) <sup>a</sup> | 0.6, 1.1       | 0.6, 1.1       | 0.6, 1.1       | 0.6, 1.2       | 0.6, 1.2       |
| $U_{eq}$ (Å <sup>2</sup> )                          | 0.8            | 0.8            | 0.8            | 0.8            | 0.8            |
| Mo: $U^{11}, U^{33}$ (Å <sup>2</sup> )              | 0.5, 0.7       | 0.5, 0.8       | 0.6, 0.8       | 0.6, 0.8       | 0.6, 0.8       |
| $U_{eq}$ (Å <sup>2</sup> )                          | 0.6            | 0.6            | 0.7            | 0.7            | 0.8            |
| O: $U^{11}, U^{22}, U^{33}$ (Å <sup>2</sup> )       | 1.0, 0.7, 1.9  | 1.1, 0.8, 2.0  | 1.1, 0.8, 2.0  | 1.2, 0.8, 2.0  | 1.2, 0.8, 2.1  |
| $U^{12}, U^{13}, U^{23}$ (Å <sup>2</sup> )          | -0.2, 0.3, 0.0 | -0.2, 0.3, 0.0 | -0.2, 0.3, 0.0 | -0.2, 0.3, 0.0 | -0.1, 0.3, 0.1 |
| $U_{eq}$ (Å <sup>2</sup> )                          | 1.2            | 1.3            | 1.3            | 1.3            | 1.4            |
| Ca–O (1) (Å)                                        | 2.466(4)       | 2.466(4)       | 2.466(4)       | 2.467(4)       | 2.468(4)       |
| Ca–O (2) (Å)                                        | 2.496(5)       | 2.497(5)       | 2.497(5)       | 2.498(5)       | 2.499(5)       |
| $V_{CaO_8}$ (Å <sup>3</sup> )                       | 27.14          | 27.15          | 27.17          | 27.19          | 27.21          |
| $\Delta_{AO_8}$ ( $\times 10^3$ )                   | 6.1            | 6.1            | 6.2            | 6.2            | 6.3            |
| Mo–O (Å)                                            | 1.742(4)       | 1.742(4)       | 1.742(4)       | 1.742(4)       | 1.742(4)       |
| $V_{MoO_4}$ (Å <sup>3</sup> )                       | 2.70           | 2.70           | 2.71           | 2.70           | 2.70           |
| Ca–O–Mo (1) (°)                                     | 120.3(2)       | 120.3(3)       | 120.3(3)       | 120.3(3)       | 120.3(3)       |
| Ca–O–Mo (2) (°)                                     | 133.2(2)       | 133.2(2)       | 133.2(2)       | 133.2(2)       | 133.3(2)       |

<sup>a</sup> Atomic displacements parameters are given as  $100 \times U^{ij}$ .

**Table S1** Structural Parameters of CaMoO<sub>4</sub> Nanocrystals From 90–480 K Extracted FromRietveld Analysis —*Continues on the following page*

|                                                     | 334 K          | 346 K          | 358 K          | 370 K         | 383 K         |
|-----------------------------------------------------|----------------|----------------|----------------|---------------|---------------|
| $a$ (Å)                                             | 5.2290(5)      | 5.2297(5)      | 5.2303(5)      | 5.2309(5)     | 5.2314(5)     |
| $c$ (Å)                                             | 11.442(2)      | 11.445(2)      | 11.447(2)      | 11.450(2)     | 11.452(2)     |
| $V$ (Å <sup>3</sup> )                               | 312.86(8)      | 313.00(8)      | 313.14(9)      | 313.29(9)     | 313.41(9)     |
| $x_o$                                               | 0.6459(8)      | 0.6459(8)      | 0.6458(9)      | 0.6457(9)     | 0.6456(9)     |
| $y_o$                                               | 0.5135(7)      | 0.5136(7)      | 0.5138(7)      | 0.5139(8)     | 0.5142(8)     |
| $z_o$                                               | 0.2089(4)      | 0.2088(4)      | 0.2088(4)      | 0.2088(5)     | 0.2088(5)     |
| Ca: $U^{11}, U^{33}$ (Å <sup>2</sup> ) <sup>a</sup> | 0.7, 1.2       | 0.7, 1.3       | 0.7, 1.3       | 0.7, 1.4      | 0.8, 1.4      |
| $U_{eq}$ (Å <sup>2</sup> )                          | 0.9            | 0.9            | 0.9            | 0.9           | 1.0           |
| Mo: $U^{11}, U^{33}$ (Å <sup>2</sup> )              | 0.6, 0.9       | 0.7, 0.9       | 0.7, 0.9       | 0.7, 0.9      | 0.7, 1.0      |
| $U_{eq}$ (Å <sup>2</sup> )                          | 0.7            | 0.8            | 0.8            | 0.8           | 0.8           |
| O: $U^{11}, U^{22}, U^{33}$ (Å <sup>2</sup> )       | 1.3, 0.8, 2.1  | 1.3, 0.9, 2.2  | 1.4, 0.9, 2.2  | 1.4, 0.9, 2.2 | 1.4, 0.9, 2.3 |
| $U^{12}, U^{13}, U^{23}$ (Å <sup>2</sup> )          | -0.1, 0.3, 0.1 | -0.1, 0.3, 0.1 | -0.1, 0.3, 0.1 | 0.0, 0.3, 0.2 | 0.0, 0.3, 0.2 |
| $U_{eq}$ (Å <sup>2</sup> )                          | 1.4            | 1.5            | 1.5            | 1.5           | 1.5           |
| Ca–O (1) (Å)                                        | 2.468(4)       | 2.470(4)       | 2.470(5)       | 2.471(5)      | 2.472(5)      |
| Ca–O (2) (Å)                                        | 2.500(5)       | 2.500(5)       | 2.501(5)       | 2.502(5)      | 2.504(5)      |
| $V_{AO_8}$ (Å <sup>3</sup> )                        | 27.24          | 27.27          | 27.30          | 27.33         | 27.36         |
| $\Delta_{AO_8}$ (×10 <sup>3</sup> )                 | 6.3            | 6.2            | 6.3            | 6.3           | 6.4           |
| Mo–O (Å)                                            | 1.742(4)       | 1.741(4)       | 1.740(4)       | 1.740(4)      | 1.739(4)      |
| $V_{MoO_4}$ (Å <sup>3</sup> )                       | 2.70           | 2.70           | 2.70           | 2.69          | 2.69          |
| Ca–O–Mo (1) (°)                                     | 120.3(3)       | 120.3(3)       | 120.3(3)       | 120.3(3)      | 120.3(3)      |
| Ca–O–Mo (2) (°)                                     | 133.3(2)       | 133.3(3)       | 133.3(3)       | 133.3(3)      | 133.4(3)      |

<sup>a</sup> Atomic displacements parameters are given as  $100 \times U^{ij}$ .

**Table S1** Structural Parameters of CaMoO<sub>4</sub> Nanocrystals From 90–480 K Extracted FromRietveld Analysis —*Continues on the following page*

|                                                     | 395 K         | 407 K         | 419 K         | 431 K         | 444 K         |
|-----------------------------------------------------|---------------|---------------|---------------|---------------|---------------|
| $a$ (Å)                                             | 5.2320(5)     | 5.2326(6)     | 5.2331(6)     | 5.2335(6)     | 5.2339(6)     |
| $c$ (Å)                                             | 11.454(2)     | 11.457(2)     | 11.459(2)     | 11.461(2)     | 11.463(2)     |
| $V$ (Å <sup>3</sup> )                               | 313.54(9)     | 313.68(9)     | 313.80(9)     | 313.92(9)     | 314.03(9)     |
| $x_o$                                               | 0.6456(9)     | 0.6455(9)     | 0.6455(9)     | 0.6454(9)     | 0.6452(9)     |
| $y_o$                                               | 0.5143(8)     | 0.5146(8)     | 0.5148(8)     | 0.5151(8)     | 0.5152(8)     |
| $z_o$                                               | 0.2088(5)     | 0.2088(5)     | 0.2088(5)     | 0.2088(5)     | 0.2089(5)     |
| Ca: $U^{11}, U^{33}$ (Å <sup>2</sup> ) <sup>a</sup> | 0.8, 1.4      | 0.8, 1.5      | 0.9, 1.5      | 0.9, 1.5      | 0.9, 1.6      |
| $U_{eq}$ (Å <sup>2</sup> )                          | 1.0           | 1.0           | 1.1           | 1.1           | 1.1           |
| Mo: $U^{11}, U^{33}$ (Å <sup>2</sup> )              | 0.7, 1.0      | 0.8, 1.0      | 0.8, 1.0      | 0.8, 1.0      | 0.8, 1.1      |
| $U_{eq}$ (Å <sup>2</sup> )                          | 0.8           | 0.9           | 0.9           | 0.9           | 0.9           |
| O: $U^{11}, U^{22}, U^{33}$ (Å <sup>2</sup> )       | 1.5, 0.9, 2.4 | 1.6, 1.0, 2.4 | 1.6, 1.0, 2.5 | 1.7, 1.0, 2.5 | 1.7, 1.0, 2.5 |
| $U^{12}, U^{13}, U^{23}$ (Å <sup>2</sup> )          | 0.0, 0.3, 0.2 | 0.0, 0.3, 0.3 | 0.0, 0.3, 0.3 | 0.0, 0.3, 0.3 | 0.0, 0.3, 0.3 |
| $U_{eq}$ (Å <sup>2</sup> )                          | 1.6           | 1.7           | 1.7           | 1.7           | 1.7           |
| Ca–O (1) (Å)                                        | 2.473(5)      | 2.474(5)      | 2.475(5)      | 2.476(5)      | 2.476(5)      |
| Ca–O (2) (Å)                                        | 2.505(5)      | 2.506(5)      | 2.507(5)      | 2.508(5)      | 2.510(5)      |
| $V_{AO_8}$ (Å <sup>3</sup> )                        | 27.39         | 27.43         | 27.46         | 27.50         | 27.53         |
| $\Delta_{AO_8}$ (×10 <sup>3</sup> )                 | 6.4           | 6.5           | 6.4           | 6.5           | 6.7           |
| Mo–O (Å)                                            | 1.738(4)      | 1.738(4)      | 1.737(4)      | 1.736(4)      | 1.736(4)      |
| $V_{MoO_4}$ (Å <sup>3</sup> )                       | 2.69          | 2.69          | 2.68          | 2.68          | 2.68          |
| Ca–O–Mo (1) (°)                                     | 120.3(3)      | 120.3(3)      | 120.3(3)      | 120.3(3)      | 120.2(3)      |
| Ca–O–Mo (2) (°)                                     | 133.4(3)      | 133.4(3)      | 133.4(3)      | 133.4(3)      | 133.5(3)      |

<sup>a</sup> Atomic displacements parameters are given as 100× $U^{ij}$ .

**Table S1** Structural Parameters of CaMoO<sub>4</sub> Nanocrystals From 90–480 K Extracted From

## Rietveld Analysis

|                                                     | 456 K         | 468 K         | 480 K         |
|-----------------------------------------------------|---------------|---------------|---------------|
| $a$ (Å)                                             | 5.2343(6)     | 5.2347(6)     | 5.2350(6)     |
| $c$ (Å)                                             | 11.466(2)     | 11.468(2)     | 11.469(2)     |
| $V$ (Å <sup>3</sup> )                               | 314.1(1)      | 314.2(1)      | 314.3(1)      |
| $x_O$                                               | 0.6451(9)     | 0.6451(9)     | 0.645(1)      |
| $y_O$                                               | 0.5154(8)     | 0.5156(8)     | 0.5156(8)     |
| $z_O$                                               | 0.2089(5)     | 0.2089(5)     | 0.2089(5)     |
| Ca: $U^{11}, U^{33}$ (Å <sup>2</sup> ) <sup>a</sup> | 0.9, 1.6      | 0.9, 1.6      | 0.9, 1.7      |
| $U_{eq}$ (Å <sup>2</sup> )                          | 1.1           | 1.1           | 1.2           |
| Mo: $U^{11}, U^{33}$ (Å <sup>2</sup> )              | 0.8, 1.1      | 0.9, 1.1      | 0.9, 1.1      |
| $U_{eq}$ (Å <sup>2</sup> )                          | 0.9           | 1.0           | 1.0           |
| O: $U^{11}, U^{22}, U^{33}$ (Å <sup>2</sup> )       | 1.8, 1.0, 2.6 | 1.8, 1.0, 2.6 | 1.9, 1.0, 2.6 |
| $U^{12}, U^{13}, U^{23}$ (Å <sup>2</sup> )          | 0.0, 0.2, 0.3 | 0.0, 0.2, 0.3 | 0.0, 0.2, 0.4 |
| $U_{eq}$ (Å <sup>2</sup> )                          | 1.8           | 1.8           | 1.8           |
| Ca–O (1) (Å)                                        | 2.477(5)      | 2.477(5)      | 2.478(5)      |
| Ca–O (2) (Å)                                        | 2.511(5)      | 2.512(5)      | 2.513(5)      |
| $V_{\Delta O_8}$ (Å <sup>3</sup> )                  | 27.56         | 27.58         | 27.60         |
| $\Delta_{\Delta O_8}$ (×10 <sup>3</sup> )           | 6.9           | 6.9           | 7.1           |
| Mo–O (Å)                                            | 1.735(4)      | 1.734(4)      | 1.734(4)      |
| $V_{MoO_4}$ (Å <sup>3</sup> )                       | 2.67          | 2.67          | 2.67          |
| Ca–O–Mo (1) (°)                                     | 120.2(3)      | 120.2(3)      | 120.2(3)      |
| Ca–O–Mo (2) (°)                                     | 133.6(3)      | 133.6(3)      | 133.6(3)      |

<sup>a</sup> Atomic displacements parameters are given as  $100 \times U^{ij}$ .

**Table S2** Structural Parameters of CaMoO<sub>4</sub> Nanocrystals From 90–480 K Extracted From PDFAnalysis — *Continues on the following page*

|                                                     | 90 K           | 102 K          | 114 K          | 127 K           | 139 K           |
|-----------------------------------------------------|----------------|----------------|----------------|-----------------|-----------------|
| $a$ (Å)                                             | 5.213          | 5.213          | 5.213          | 5.213           | 5.214           |
| $c$ (Å)                                             | 11.373         | 11.374         | 11.376         | 11.377          | 11.379          |
| $V$ (Å <sup>3</sup> )                               | 309.0          | 309.1          | 309.1          | 309.2           | 309.3           |
| $x_o$                                               | 0.650          | 0.649          | 0.649          | 0.648           | 0.648           |
| $y_o$                                               | 0.506          | 0.506          | 0.506          | 0.506           | 0.506           |
| $z_o$                                               | 0.211          | 0.211          | 0.211          | 0.211           | 0.211           |
| Ca: $U^{11}, U^{33}$ (Å <sup>2</sup> ) <sup>a</sup> | 0.6, 0.9       | 0.6, 0.9       | 0.6, 1.0       | 0.6, 1.0        | 0.6, 1.0        |
| $U_{eq}$ (Å <sup>2</sup> )                          | 0.7            | 0.7            | 0.7            | 0.7             | 0.7             |
| Mo: $U^{11}, U^{33}$ (Å <sup>2</sup> )              | 0.4, 0.5       | 0.4, 0.5       | 0.4, 0.5       | 0.4, 0.5        | 0.4, 0.6        |
| $U_{eq}$ (Å <sup>2</sup> )                          | 0.4            | 0.4            | 0.5            | 0.5             | 0.5             |
| O: $U^{11}, U^{22}, U^{33}$ (Å <sup>2</sup> )       | 1.0, 3.0, 1.5  | 1.1, 3.1, 1.6  | 1.3, 3.2, 1.6  | 1.4, 3.2, 1.6   | 1.5, 3.3, 1.6   |
| $U^{12}, U^{13}, U^{23}$ (Å <sup>2</sup> )          | -0.2, 0.1, 1.3 | -0.2, 0.0, 1.4 | -0.2, 0.0, 1.4 | -0.2, -0.1, 1.5 | -0.2, -0.1, 1.5 |
| $U_{eq}$ (Å <sup>2</sup> )                          | 1.9            | 1.9            | 2.0            | 2.1             | 2.1             |
| Ca–O (1) (Å)                                        | 2.426          | 2.425          | 2.424          | 2.422           | 2.421           |
| Ca–O (2) (Å)                                        | 2.460          | 2.463          | 2.466          | 2.470           | 2.472           |
| $V_{AO_8}$ (Å <sup>3</sup> )                        | 25.91          | 25.94          | 25.97          | 26.01           | 26.03           |
| $\Delta_{AO_8}$ ( $\times 10^3$ )                   | 7.0            | 7.7            | 8.7            | 9.8             | 10.5            |
| Mo–O (Å)                                            | 1.783          | 1.782          | 1.781          | 1.781           | 1.780           |
| $V_{MoO_4}$ (Å <sup>3</sup> )                       | 2.89           | 2.89           | 2.89           | 2.89            | 2.89            |
| Ca–O–Mo (1) (°)                                     | 119.8          | 119.7          | 119.5          | 119.4           | 119.3           |
| Ca–O–Mo (2) (°)                                     | 132.2          | 132.3          | 132.5          | 132.7           | 132.8           |

<sup>a</sup> Atomic displacements parameters are given as  $100 \times U^{ij}$ .

**Table S2** Structural Parameters of CaMoO<sub>4</sub> Nanocrystals From 90–480 K Extracted From PDFAnalysis — *Continues on the following page*

|                                                     | 151 K           | 163 K           | 175 K           | 188 K           | 200 K          |
|-----------------------------------------------------|-----------------|-----------------|-----------------|-----------------|----------------|
| $a$ (Å)                                             | 5.214           | 5.214           | 5.214           | 5.215           | 5.216          |
| $c$ (Å)                                             | 11.381          | 11.384          | 11.386          | 11.388          | 11.390         |
| $V$ (Å <sup>3</sup> )                               | 309.4           | 309.5           | 309.6           | 309.7           | 309.8          |
| $x_o$                                               | 0.647           | 0.644           | 0.644           | 0.643           | 0.643          |
| $y_o$                                               | 0.507           | 0.508           | 0.508           | 0.508           | 0.508          |
| $z_o$                                               | 0.211           | 0.213           | 0.213           | 0.213           | 0.213          |
| Ca: $U^{11}, U^{33}$ (Å <sup>2</sup> ) <sup>a</sup> | 0.6, 1.0        | 0.6, 1.1        | 0.7, 1.1        | 0.7, 1.1        | 0.7, 1.2       |
| $U_{eq}$ (Å <sup>2</sup> )                          | 0.8             | 0.8             | 0.8             | 0.8             | 0.8            |
| Mo: $U^{11}, U^{33}$ (Å <sup>2</sup> )              | 0.4, 0.6        | 0.5, 0.6        | 0.5, 0.6        | 0.5, 0.7        | 0.5, 0.7       |
| $U_{eq}$ (Å <sup>2</sup> )                          | 0.5             | 0.5             | 0.5             | 0.5             | 0.6            |
| O: $U^{11}, U^{22}, U^{33}$ (Å <sup>2</sup> )       | 1.7, 3.3, 1.7   | 2.4, 3.2, 1.7   | 2.5, 3.3, 1.7   | 2.7, 3.4, 1.7   | 2.8, 3.4, 1.7  |
| $U^{12}, U^{13}, U^{23}$ (Å <sup>2</sup> )          | -0.2, -0.2, 1.5 | -0.1, -0.4, 1.6 | -0.1, -0.4, 1.6 | -0.1, -0.5, 1.7 | 0.0, -0.5, 1.7 |
| $U_{eq}$ (Å <sup>2</sup> )                          | 2.2             | 2.4             | 2.5             | 2.6             | 2.6            |
| Ca–O (1) (Å)                                        | 2.419           | 2.407           | 2.405           | 2.404           | 2.403          |
| Ca–O (2) (Å)                                        | 2.477           | 2.496           | 2.499           | 2.503           | 2.505          |
| $V_{AO_8}$ (Å <sup>3</sup> )                        | 26.08           | 26.20           | 26.23           | 26.27           | 26.30          |
| $\Delta_{AO_8}$ ( $\times 10^3$ )                   | 11.9            | 18.3            | 19.2            | 20.3            | 20.8           |
| Mo–O (Å)                                            | 1.779           | 1.777           | 1.777           | 1.776           | 1.776          |
| $V_{MoO_4}$ (Å <sup>3</sup> )                       | 2.88            | 2.88            | 2.88            | 2.87            | 2.87           |
| Ca–O–Mo (1) (°)                                     | 119.1           | 118.3           | 118.2           | 118.0           | 118.0          |
| Ca–O–Mo (2) (°)                                     | 133.0           | 134.0           | 134.2           | 134.4           | 134.5          |

<sup>a</sup> Atomic displacements parameters are given as  $100 \times U^{ij}$ .

**Table S2** Structural Parameters of CaMoO<sub>4</sub> Nanocrystals From 90–480 K Extracted From PDFAnalysis — *Continues on the following page*

|                                                     | 212 K          | 224 K          | 236 K          | 248 K          | 261 K          |
|-----------------------------------------------------|----------------|----------------|----------------|----------------|----------------|
| $a$ (Å)                                             | 5.216          | 5.217          | 5.217          | 5.218          | 5.219          |
| $c$ (Å)                                             | 11.390         | 11.393         | 11.395         | 11.397         | 11.399         |
| $V$ (Å <sup>3</sup> )                               | 309.8          | 310.1          | 310.2          | 310.3          | 310.4          |
| $x_o$                                               | 0.642          | 0.642          | 0.642          | 0.642          | 0.641          |
| $y_o$                                               | 0.508          | 0.508          | 0.508          | 0.508          | 0.508          |
| $z_o$                                               | 0.213          | 0.213          | 0.213          | 0.213          | 0.213          |
| Ca: $U^{11}, U^{33}$ (Å <sup>2</sup> ) <sup>a</sup> | 0.7, 1.2       | 0.7, 1.2       | 0.8, 1.3       | 0.8, 1.3       | 0.8, 1.3       |
| $U_{eq}$ (Å <sup>2</sup> )                          | 0.9            | 0.9            | 0.9            | 0.9            | 1.0            |
| Mo: $U^{11}, U^{33}$ (Å <sup>2</sup> )              | 0.5, 0.7       | 0.5, 0.7       | 0.5, 0.8       | 0.6, 0.8       | 0.6, 0.8       |
| $U_{eq}$ (Å <sup>2</sup> )                          | 0.6            | 0.6            | 0.6            | 0.6            | 0.6            |
| O: $U^{11}, U^{22}, U^{33}$ (Å <sup>2</sup> )       | 2.9, 3.5, 1.8  | 3.0, 3.6, 1.8  | 3.1, 3.6, 1.8  | 3.2, 3.7, 1.9  | 3.2, 3.7, 1.9  |
| $U^{12}, U^{13}, U^{23}$ (Å <sup>2</sup> )          | 0.0, -0.5, 1.7 | 0.0, -0.5, 1.8 | 0.0, -0.5, 1.8 | 0.0, -0.5, 1.8 | 0.0, -0.6, 1.8 |
| $U_{eq}$ (Å <sup>2</sup> )                          | 2.7            | 2.8            | 2.8            | 2.9            | 3.0            |
| Ca–O (1) (Å)                                        | 2.402          | 2.401          | 2.401          | 2.401          | 2.401          |
| Ca–O (2) (Å)                                        | 2.509          | 2.511          | 2.513          | 2.514          | 2.516          |
| $V_{AO_8}$ (Å <sup>3</sup> )                        | 26.34          | 26.37          | 26.39          | 26.42          | 26.44          |
| $\Delta_{AO_8}$ ( $\times 10^3$ )                   | 21.8           | 22.3           | 22.8           | 23.2           | 23.4           |
| Mo–O (Å)                                            | 1.775          | 1.775          | 1.774          | 1.774          | 1.774          |
| $V_{MoO_4}$ (Å <sup>3</sup> )                       | 2.87           | 2.87           | 2.87           | 2.86           | 2.86           |
| Ca–O–Mo (1) (°)                                     | 117.8          | 117.8          | 117.7          | 117.7          | 117.7          |
| Ca–O–Mo (2) (°)                                     | 134.7          | 134.8          | 134.8          | 134.9          | 135.0          |

<sup>a</sup> Atomic displacements parameters are given as  $100 \times U^{ij}$ .

**Table S2** Structural Parameters of CaMoO<sub>4</sub> Nanocrystals From 90–480 K Extracted From PDFAnalysis — *Continues on the following page*

|                                                     | 273 K          | 285 K          | 297 K          | 309 K          | 322 K          |
|-----------------------------------------------------|----------------|----------------|----------------|----------------|----------------|
| $a$ (Å)                                             | 5.219          | 5.220          | 5.221          | 5.221          | 5.222          |
| $c$ (Å)                                             | 11.401         | 11.403         | 11.404         | 11.406         | 11.409         |
| $V$ (Å <sup>3</sup> )                               | 310.6          | 310.7          | 310.8          | 311.0          | 311.1          |
| $x_O$                                               | 0.641          | 0.641          | 0.641          | 0.641          | 0.641          |
| $y_O$                                               | 0.508          | 0.508          | 0.508          | 0.508          | 0.508          |
| $z_O$                                               | 0.213          | 0.213          | 0.213          | 0.213          | 0.213          |
| Ca: $U^{11}, U^{33}$ (Å <sup>2</sup> ) <sup>a</sup> | 0.8, 1.3       | 0.8, 1.4       | 0.9, 1.4       | 0.9, 1.4       | 0.9, 1.5       |
| $U_{eq}$ (Å <sup>2</sup> )                          | 1.0            | 1.0            | 1.0            | 1.1            | 1.1            |
| Mo: $U^{11}, U^{33}$ (Å <sup>2</sup> )              | 0.6, 0.8       | 0.6, 0.8       | 0.6, 0.9       | 0.6, 0.9       | 0.6, 0.9       |
| $U_{eq}$ (Å <sup>2</sup> )                          | 0.7            | 0.7            | 0.7            | 0.7            | 0.7            |
| O: $U^{11}, U^{22}, U^{33}$ (Å <sup>2</sup> )       | 3.3, 3.7, 2.0  | 3.4, 3.8, 2.0  | 3.4, 3.8, 2.0  | 3.5, 3.8, 2.1  | 3.6, 3.9, 2.2  |
| $U^{12}, U^{13}, U^{23}$ (Å <sup>2</sup> )          | 0.0, -0.6, 1.8 | 0.0, -0.6, 1.9 | 0.0, -0.6, 1.9 | 0.1, -0.6, 1.9 | 0.1, -0.7, 1.9 |
| $U_{eq}$ (Å <sup>2</sup> )                          | 3.0            | 3.0            | 3.1            | 3.1            | 3.2            |
| Ca–O (1) (Å)                                        | 2.401          | 2.401          | 2.401          | 2.401          | 2.402          |
| Ca–O (2) (Å)                                        | 2.516          | 2.517          | 2.518          | 2.519          | 2.520          |
| $V_{AO_8}$ (Å <sup>3</sup> )                        | 26.46          | 26.48          | 26.50          | 26.52          | 26.55          |
| $\Delta_{AO_8}$ ( $\times 10^3$ )                   | 23.4           | 23.7           | 23.8           | 24.0           | 23.9           |
| Mo–O (Å)                                            | 1.774          | 1.773          | 1.773          | 1.773          | 1.773          |
| $V_{MoO_4}$ (Å <sup>3</sup> )                       | 2.86           | 2.86           | 2.86           | 2.86           | 2.86           |
| Ca–O–Mo (1) (°)                                     | 117.7          | 117.6          | 117.6          | 117.6          | 117.6          |
| Ca–O–Mo (2) (°)                                     | 135.0          | 135.1          | 135.1          | 135.1          | 135.2          |

<sup>a</sup> Atomic displacements parameters are given as  $100 \times U^{ij}$ .



**Table S2** Structural Parameters of CaMoO<sub>4</sub> Nanocrystals From 90–480 K Extracted From PDFAnalysis — *Continues on the following page*

|                                                     | 334 K          | 346 K          | 358 K          | 370 K          | 383 K          |
|-----------------------------------------------------|----------------|----------------|----------------|----------------|----------------|
| $a$ (Å)                                             | 5.223          | 5.224          | 5.224          | 5.225          | 5.226          |
| $c$ (Å)                                             | 11.411         | 11.413         | 11.415         | 11.418         | 11.420         |
| $V$ (Å <sup>3</sup> )                               | 311.3          | 311.4          | 311.6          | 311.7          | 311.8          |
| $x_o$                                               | 0.640          | 0.640          | 0.640          | 0.640          | 0.640          |
| $y_o$                                               | 0.508          | 0.508          | 0.508          | 0.508          | 0.508          |
| $z_o$                                               | 0.213          | 0.213          | 0.213          | 0.213          | 0.213          |
| Ca: $U^{11}, U^{33}$ (Å <sup>2</sup> ) <sup>a</sup> | 1.0, 1.5       | 1.0, 1.5       | 1.0, 1.5       | 1.0, 1.6       | 1.1, 1.6       |
| $U_{eq}$ (Å <sup>2</sup> )                          | 1.1            | 1.2            | 1.2            | 1.2            | 1.3            |
| Mo: $U^{11}, U^{33}$ (Å <sup>2</sup> )              | 0.7, 0.9       | 0.7, 1.0       | 0.7, 1.0       | 0.7, 1.0       | 0.7, 1.0       |
| $U_{eq}$ (Å <sup>2</sup> )                          | 0.8            | 0.8            | 0.8            | 0.8            | 0.8            |
| O: $U^{11}, U^{22}, U^{33}$ (Å <sup>2</sup> )       | 3.6, 3.9, 2.2  | 3.7, 4.0, 2.3  | 3.7, 4.0, 2.4  | 3.8, 4.0, 2.4  | 3.9, 4.1, 2.5  |
| $U^{12}, U^{13}, U^{23}$ (Å <sup>2</sup> )          | 0.1, -0.7, 1.9 | 0.1, -0.7, 2.0 | 0.1, -0.8, 1.9 | 0.1, -0.8, 2.0 | 0.1, -0.8, 2.0 |
| $U_{eq}$ (Å <sup>2</sup> )                          | 3.3            | 3.3            | 3.4            | 3.4            | 3.5            |
| Ca–O (1) (Å)                                        | 2.403          | 2.403          | 2.405          | 2.405          | 2.405          |
| Ca–O (2) (Å)                                        | 2.521          | 2.521          | 2.521          | 2.522          | 2.523          |
| $V_{AO_8}$ (Å <sup>3</sup> )                        | 26.57          | 26.59          | 26.61          | 26.63          | 26.65          |
| $\Delta_{AO_8}$ ( $\times 10^3$ )                   | 23.9           | 24.0           | 23.7           | 23.7           | 23.8           |
| Mo–O (Å)                                            | 1.772          | 1.772          | 1.772          | 1.772          | 1.772          |
| $V_{MoO_4}$ (Å <sup>3</sup> )                       | 2.86           | 2.86           | 2.85           | 2.85           | 2.85           |
| Ca–O–Mo (1) (°)                                     | 117.6          | 117.6          | 117.7          | 117.7          | 117.7          |
| Ca–O–Mo (2) (°)                                     | 135.2          | 135.2          | 135.2          | 135.2          | 135.3          |

<sup>a</sup> Atomic displacements parameters are given as  $100 \times U^{ij}$ .

**Table S2** Structural Parameters of CaMoO<sub>4</sub> Nanocrystals From 90–480 K Extracted From PDFAnalysis — *Continues on the following page*

|                                                     | 395 K          | 407 K          | 419 K          | 431 K          | 444 K          |
|-----------------------------------------------------|----------------|----------------|----------------|----------------|----------------|
| $a$ (Å)                                             | 5.226          | 5.227          | 5.228          | 5.228          | 5.229          |
| $c$ (Å)                                             | 11.422         | 11.424         | 11.426         | 11.429         | 11.431         |
| $V$ (Å <sup>3</sup> )                               | 312.0          | 312.1          | 312.3          | 312.4          | 312.5          |
| $x_o$                                               | 0.640          | 0.640          | 0.640          | 0.640          | 0.640          |
| $y_o$                                               | 0.508          | 0.508          | 0.508          | 0.508          | 0.508          |
| $z_o$                                               | 0.213          | 0.213          | 0.213          | 0.213          | 0.213          |
| Ca: $U^{11}, U^{33}$ (Å <sup>2</sup> ) <sup>a</sup> | 1.1, 1.6       | 1.1, 1.6       | 1.2, 1.7       | 1.2, 1.7       | 1.2, 1.7       |
| $U_{eq}$ (Å <sup>2</sup> )                          | 1.3            | 1.3            | 1.3            | 1.4            | 1.4            |
| Mo: $U^{11}, U^{33}$ (Å <sup>2</sup> )              | 0.7, 1.1       | 0.8, 1.1       | 0.8, 1.1       | 0.8, 1.1       | 0.8, 1.2       |
| $U_{eq}$ (Å <sup>2</sup> )                          | 0.9            | 0.9            | 0.9            | 0.9            | 0.9            |
| O: $U^{11}, U^{22}, U^{33}$ (Å <sup>2</sup> )       | 3.9, 4.1, 2.6  | 4.0, 4.0, 2.6  | 4.0, 4.1, 2.7  | 4.1, 4.1, 2.7  | 4.1, 4.1, 2.8  |
| $U^{12}, U^{13}, U^{23}$ (Å <sup>2</sup> )          | 0.1, -0.8, 2.0 | 0.2, -0.9, 2.0 | 0.2, -0.9, 2.0 | 0.2, -0.9, 2.0 | 0.2, -0.9, 2.0 |
| $U_{eq}$ (Å <sup>2</sup> )                          | 3.5            | 3.5            | 3.6            | 3.6            | 3.7            |
| Ca–O (1) (Å)                                        | 2.406          | 2.407          | 2.408          | 2.408          | 2.408          |
| Ca–O (2) (Å)                                        | 2.523          | 2.523          | 2.524          | 2.524          | 2.525          |
| $V_{AO_8}$ (Å <sup>3</sup> )                        | 26.67          | 26.68          | 26.70          | 26.72          | 26.74          |
| $\Delta_{AO_8}$ ( $\times 10^3$ )                   | 23.6           | 23.7           | 23.5           | 23.5           | 23.7           |
| Mo–O (Å)                                            | 1.771          | 1.771          | 1.771          | 1.771          | 1.771          |
| $V_{MoO_4}$ (Å <sup>3</sup> )                       | 2.85           | 2.85           | 2.85           | 2.85           | 2.85           |
| Ca–O–Mo (1) (°)                                     | 117.7          | 117.7          | 117.7          | 117.7          | 117.7          |
| Ca–O–Mo (2) (°)                                     | 135.2          | 135.3          | 135.3          | 135.3          | 135.3          |

<sup>a</sup> Atomic displacements parameters are given as  $100 \times U^{ij}$ .

**Table S2** Structural Parameters of CaMoO<sub>4</sub> Nanocrystals From 90–480 K Extracted From PDF

| Analysis                                            |                |                |                |
|-----------------------------------------------------|----------------|----------------|----------------|
|                                                     | 456 K          | 468 K          | 480 K          |
| $a$ (Å)                                             | 5.229          | 5.230          | 5.230          |
| $c$ (Å)                                             | 11.433         | 11.435         | 11.436         |
| $V$ (Å <sup>3</sup> )                               | 312.6          | 312.8          | 312.9          |
| $x_O$                                               | 0.640          | 0.640          | 0.640          |
| $y_O$                                               | 0.508          | 0.508          | 0.508          |
| $z_O$                                               | 0.213          | 0.213          | 0.213          |
| Ca: $U^{11}, U^{33}$ (Å <sup>2</sup> ) <sup>a</sup> | 1.3, 1.7       | 1.3, 1.8       | 1.3, 1.8       |
| $U_{eq}$ (Å <sup>2</sup> )                          | 1.4            | 1.5            | 1.5            |
| Mo: $U^{11}, U^{33}$ (Å <sup>2</sup> )              | 0.8, 1.2       | 0.8, 1.2       | 0.8, 1.2       |
| $U_{eq}$ (Å <sup>2</sup> )                          | 0.9            | 1.0            | 1.0            |
| O: $U^{11}, U^{22}, U^{33}$ (Å <sup>2</sup> )       | 4.2, 4.1, 2.8  | 4.2, 4.1, 2.9  | 4.2, 4.1, 2.9  |
| $U^{12}, U^{13}, U^{23}$ (Å <sup>2</sup> )          | 0.2, -1.0, 2.0 | 0.2, -1.0, 2.0 | 0.3, -1.0, 2.0 |
| $U_{eq}$ (Å <sup>2</sup> )                          | 3.7            | 3.7            | 3.8            |
| Ca–O (1) (Å)                                        | 2.409          | 2.409          | 2.409          |
| Ca–O (2) (Å)                                        | 2.525          | 2.527          | 2.527          |
| $V_{AO_8}$ (Å <sup>3</sup> )                        | 26.76          | 26.78          | 26.79          |
| $\Delta_{AO_8}$ (×10 <sup>3</sup> )                 | 23.5           | 23.9           | 23.8           |
| Mo–O (Å)                                            | 1.771          | 1.771          | 1.770          |
| $V_{MoO_4}$ (Å <sup>3</sup> )                       | 2.85           | 2.85           | 2.85           |
| Ca–O–Mo (1) (°)                                     | 117.7          | 117.7          | 117.7          |
| Ca–O–Mo (2) (°)                                     | 135.3          | 135.4          | 135.4          |

<sup>a</sup> Atomic displacements parameters are given as  $100 \times U^{ij}$ .

## References

1. F. A. Rabuffetti and R. L. Brutchey, *Chem. Mater.*, 2011, **23**, 4063.
2. S. P. Culver, F. A. Rabuffetti, S. Zhou, M. Mecklenburg, Y. Song, B. C. Melot and R. L. Brutchey, *Chem. Mater.*, 2013, **25**, 4129.
3. A. C. Larson and R. B. Von Dreele, *General Structure Analysis System (GSAS)*, Los Alamos National Laboratory: Los Alamos, NM, 2000.
4. B. H. Toby, *J. Appl. Crystallogr.*, 2011, **34**, 210.
5. P. Thompson, D. E. Cox and J. M. Hastings, *J. Appl. Crystallogr.*, 1987, **20**, 79.
6. R. A. Young, *The Rietveld Method*, Oxford University Press: New York, 1993.
7. V. J. Petkov, *J. Appl. Crystallogr.*, 1989, **22**, 387.
8. C. L. Farrow, P. Juhas, J. W. Liu, D. Bryndin, E. S. Bozin, J. Bloch, T. Proffen and S. J. L. Billinge, *J. Phys: Condens. Matter*, 2007, **19**, 335219.
9. V. Petkov, M. Gateshki, M. Niederberger and Y. Ren, *Chem. Mater.*, 2006, **18**, 814.
